# Supplementary material for: Oligoethylene glycol-substituted aza-BODIPY dyes as red emitting ER-probes
Source: Royal Society of Chemistry journal article supplement (doi:10.1039/c5ob01104c), 2015-01-01
Supplement: c5ob01104c1.pdf [file c5ob01104c1.pdf]

# Oligoethylene Glycol-substituted Aza- BODIPY Dyes As Red Emitting ER- Probes

## Supporting Information

Anyanee Kamkaew,<sup>1</sup> Sopida Thavornpradit,<sup>1,2</sup> Thamon

Puangsamlee,<sup>1,2</sup> Dongyue Xin,<sup>1</sup> Nantanit Wanichacheva,<sup>2</sup> and Kevin  
Burgess<sup>1,3</sup>

<sup>1</sup> Department of Chemistry, Texas A & M University, Box 30012, College Station,  
TX 77842, USA

<sup>2</sup> Department of Chemistry, Faculty of Science, Silpakorn University, Nakorn  
Pathom, 73000, Thailand

<sup>3</sup> Department of Pharmacology, Faculty of Medicine, University of Malaya, 50603  
Kuala Lumpur, Malaysia.

|                                                                                                       |    |
|-------------------------------------------------------------------------------------------------------|----|
| 1. General Procedures .....                                                                           | 2  |
| 2. Syntheses Of Oligoethylene Glycol-strapped Aza-BODIPY .....                                        | 3  |
| 3. Experimental Procedures And Characterization Of Oligoethylene Glycol-<br>strapped Aza-BODIPY ..... | 4  |
| 4. Relative Yield Experiments .....                                                                   | 28 |
| 5. Fluorescence Spectroscopy .....                                                                    | 32 |
| 6. Structural Optimization by DFT Calculations and Cartesian Coordinates .....                        | 35 |
| 7. Cellular Imaging .....                                                                             | 47 |

## 1. General Procedures

All reactions were carried out under an atmosphere of dry argon. Glassware was oven-dried prior to use. Unless otherwise indicated, common reagents or materials were obtained from commercial source and used without further purification. Tetrahydrofuran (THF), dichloromethane ( $\text{CH}_2\text{Cl}_2$ ), and methanol (MeOH) were dried by Mbraun solvent drying system. Other solvents and reagents were used as received.

NMR spectra were recorded on a Bruker-400 MHz spectrometers ( $^1\text{H}$  at 400 MHz and  $^{13}\text{C}$  at 100 MHz) at room temperature unless other mentioned. Chemical shifts of  $^1\text{H}$  NMR spectra were recorded and chemical shifts are reported in ppm from the solvent resonance ( $\text{CDCl}_3$  7.26 ppm,  $\text{CD}_3\text{OD}$  3.30 ppm, acetone- $\text{d}_6$  2.05 ppm). Data are reported as follows: chemical shift, multiplicity (s = singlet, br = broad, d = doublet, t = triplet, q = quartet, m = multiplet), coupling constants, and number of protons. Proton decoupled  $^{13}\text{C}$  NMR spectra were also recorded in ppm from tetramethylsilane (TMS) resonance ( $\text{CDCl}_3$  77.0,  $\text{CD}_3\text{OD}$  49.1, acetone- $\text{d}_6$  206.26 and 29.84 ppm). Analytical thin layer chromatography (TLC) was performed on EM Reagents 0.25 mm silica-gel 60-F plates, and visualized with UV light. Flash chromatography was performed using silica gel 60 (230–400 mesh). MS were measured under ESI or MALDI conditions.

Analytical HPLC analyses were carried out on 150 x 4.6 mm C-18 column using gradient conditions (80 – 95% B, flow rate = 0.75 mL/min).

## 2. Syntheses Of Oligoethylene Glycol-strapped Aza-BODIPY

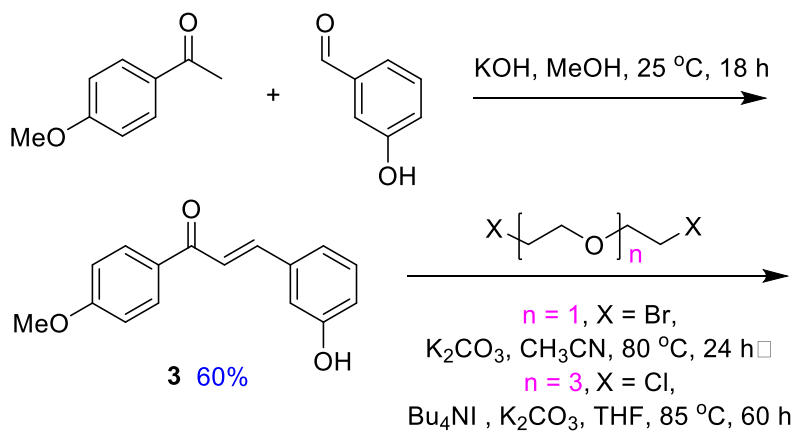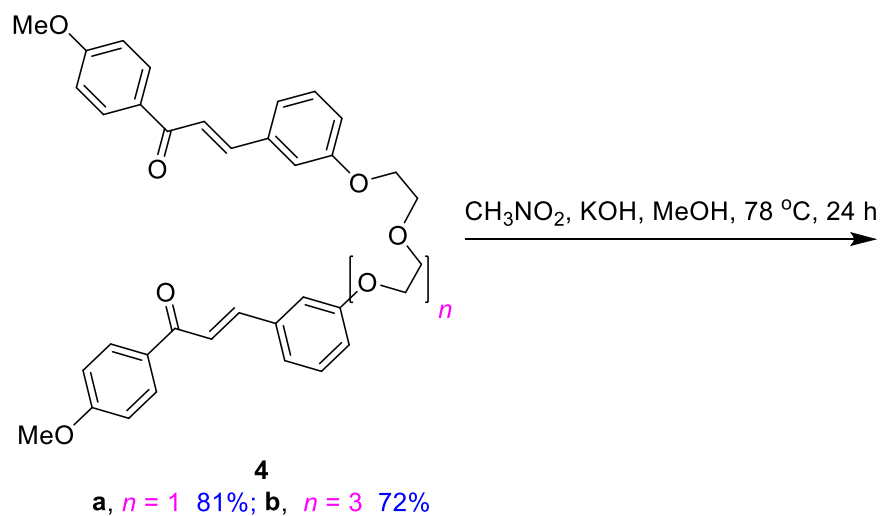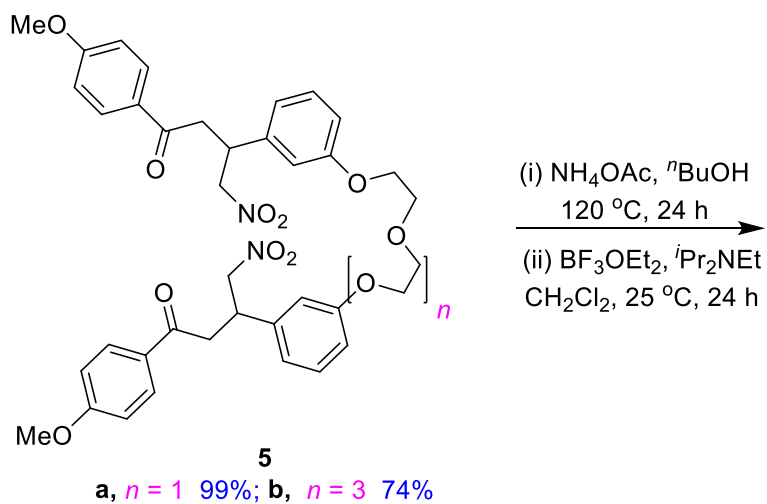

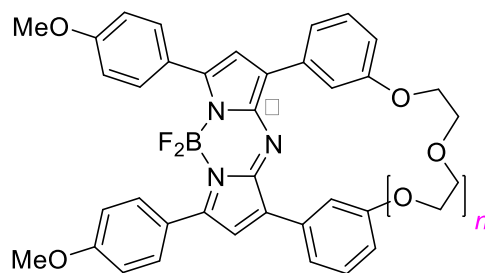

□

**1**  
 a,  $n = 1$  14%; b,  $n = 3$  3%

### 3. Experimental Procedures And Characterization Of Oligoethylene Glycol-strapped Aza-BODIPY

#### (*E*)-3-(3-hydroxyphenyl)-1-(4-methoxyphenyl)prop-2-en-1-one (**3**).

An aqueous solution of sodium hydroxide (60%, 16 mL) was added to a solution of 4-methoxyacetophenone (5 g, 33 mmol) and 3-hydroxybenzaldehyde (4 g, 33 mmol) in methanol (20 mL) and stirred at room temperature for a period of 24 h. The reaction mixture was poured into ice water and adjusted pH to 2 (using HCl). The obtained solid was filtered and recrystallized from ethanol to yield 5 g (60%) of **3** as a white solid.  $^1\text{H}$  NMR (400 MHz,  $\text{CDCl}_3$ )  $\delta$  7.99 (d,  $J = 8.4$  Hz, 2H), 7.69 (d,  $J = 15.6$  Hz, 1H), 7.46 (d,  $J = 15.6$  Hz, 1H), 7.22 (d,  $J = 8.0$  Hz, 1H), 7.13 (d,  $J = 7.6$  Hz, 1H), 7.07 (s, 1H), 6.95 (d,  $J = 8.8$  Hz, 2H), 6.85 (d,  $J = 8.0$  Hz, 1H), 3.86 (s, 3H).  $^{13}\text{C}$  NMR (100 MHz,  $\text{CDCl}_3$ )  $\delta$  189.2, 163.5, 156.8, 144.2, 136.5, 131.0, 130.9, 130.0, 122.1, 120.4, 117.6, 114.9, 113.9, 55.5. HRMS (ESI) calcd for  $\text{C}_{16}\text{H}_{14}\text{O}_3$   $\{M+\text{Li}\}^+$  261.1103, found 261.1076.

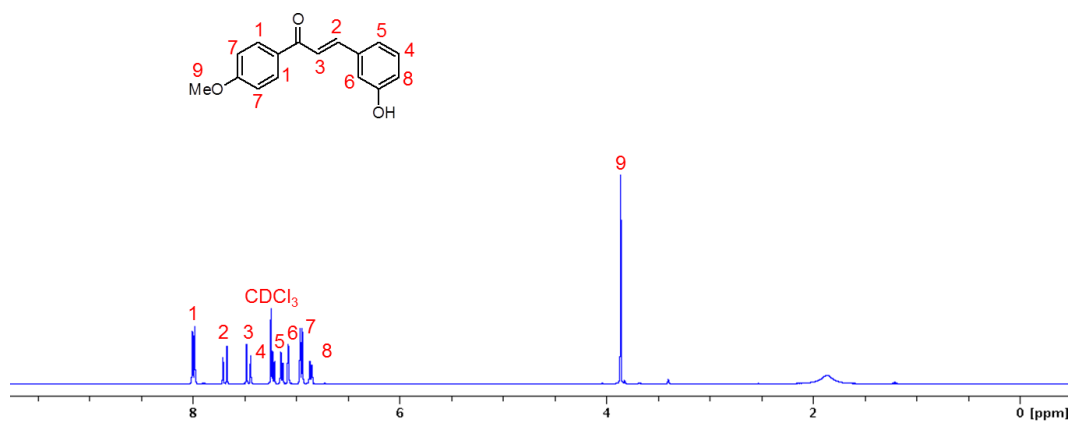

**<sup>1</sup>H-NMR of compound 3**

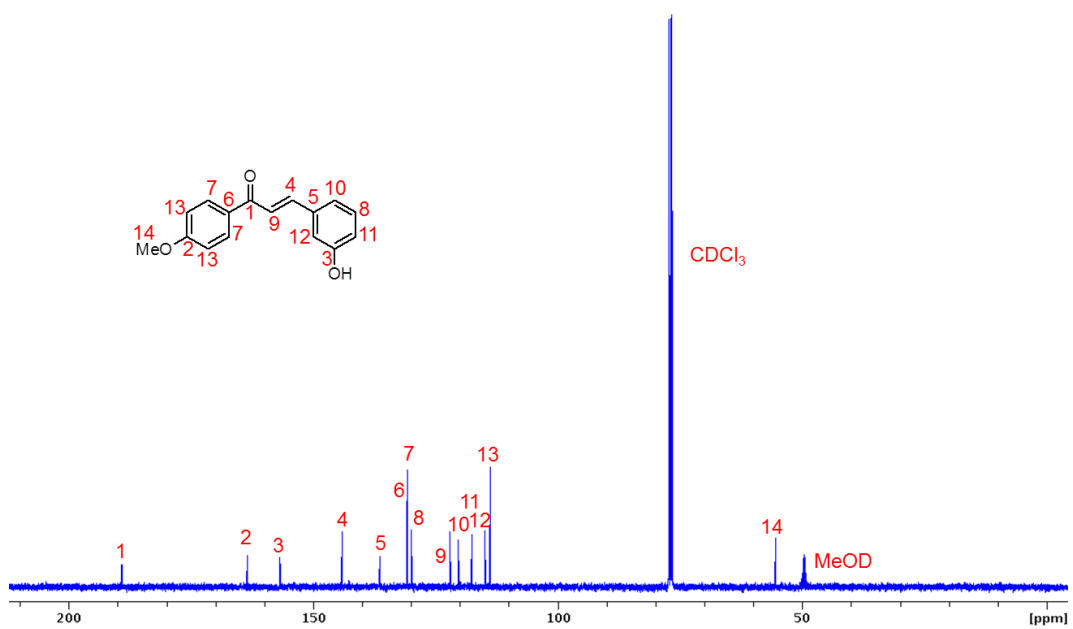

**<sup>13</sup>C-NMR of compound 3**

**(2E,2'E)-3,3'-(((oxybis(ethane-2,1-diyl))bis(oxy))bis(3,1-phenylene))bis(1-(4-methoxy phenyl)prop-2-en-1-one) (4a).** Anhydrous potassium carbonate (0.95 g, 6.90 mmol) was added to a solution of **3** (1.00 g, 3.93 mmol) and bis(2-bromoethyl)ether (0.24 mL, 1.97 mmol) in acetonitrile (20 mL). The reaction mixture was heated at reflux for 24 h. Then solvent was removed under vacuum. The residue was redissolved in ethyl acetate and extracted with 0.2 N NaOH (2 × 20 mL) and H<sub>2</sub>O (20 mL). The organic layer was dried over MgSO<sub>4</sub>, filtered, and the solvent was removed under reduced pressure. The residue was purified by flash silica column chromatography eluting with hexanes:EtOAc (2:1) to yield 875 mg (81 %) of **4a** as a white solid. <sup>1</sup>H NMR (400 MHz, CDCl<sub>3</sub>) δ 8.05 (d, *J* = 8 Hz, 4H), 7.76 (d, *J* = 8.0 Hz, 2H), 7.52 (d, *J* = 8 Hz, 2H), 7.34 (t, *J* = 8 Hz, 2H), 7.26 (t, *J* = 4 Hz, 2H), 7.21 (s, 2H), 7.00 (d, *J* = 8 Hz, 6H), 4.25 (t, *J* = 4 , 4H), 4.00 (t, *J* = 4 Hz, 4H), 3.91 (s, 6H). <sup>13</sup>C NMR (100 MHz, CDCl<sub>3</sub>) δ 186.6, 163.5, 159.1, 143.8, 136.5, 131.2, 131.1, 130.8, 129.9, 122.3, 121.3, 116.7, 114.2, 113.9, 113.8, 70.0, 67.7, 55.5. MS (ESI) calcd for C<sub>36</sub>H<sub>34</sub>O<sub>7</sub> {M+Li}<sup>+</sup> 585.2465, found 585.2548.

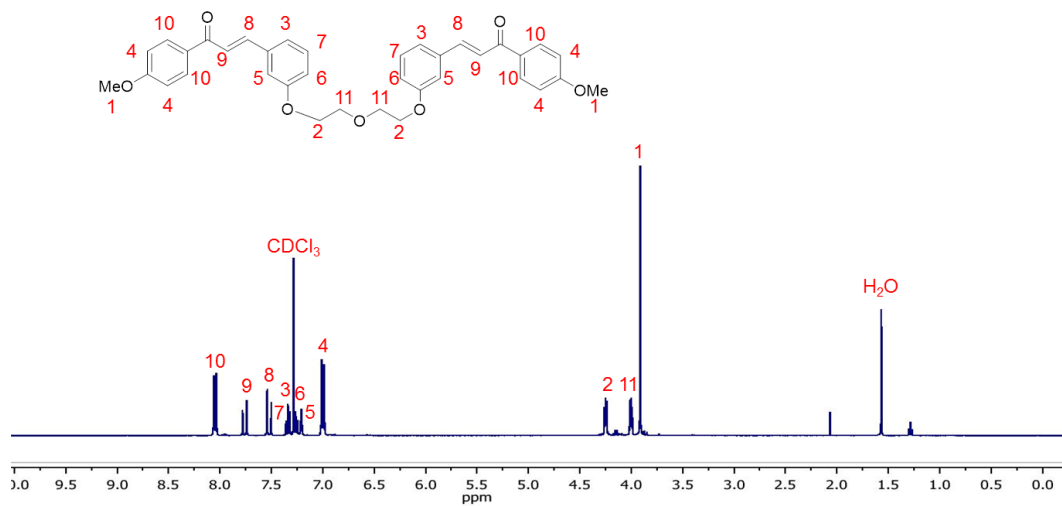

<sup>1</sup>H-NMR of compound 4a

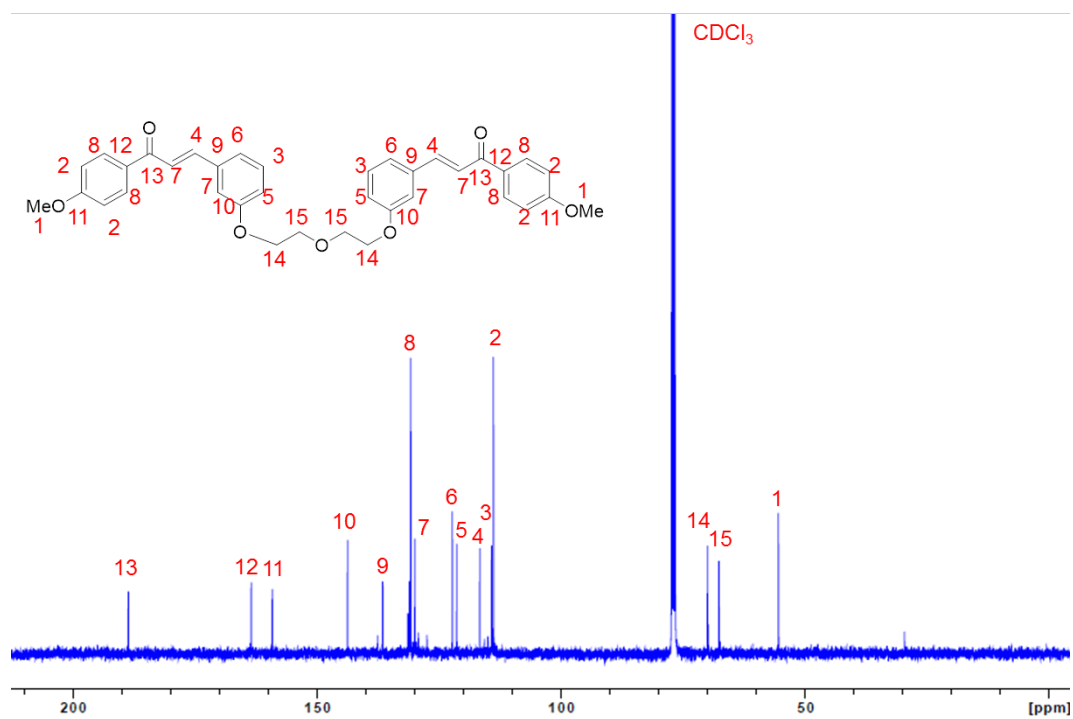

<sup>13</sup>C-NMR of compound 4a

**3,3'-(((Oxybis(ethane-2,1-diyl))bis(oxy))bis(3,1-phenylene))bis(1-(4-methoxyphenyl)-4-nitrobutan-1-one) (5a).** **4a** (875 mg, 2.70 mmol), nitromethane (5.80 mL, 108 mmol) and potassium hydroxide (330 mg, 5.90 mmol) were dissolved in dry methanol (15 mL) and heated under reflux for 24 h. The reaction mixture was cooled and solvent was removed. The residue was dissolved in ethyl acetate and extracted with 0.2 M HCl (2 × 20 mL). The aqueous phase was extracted with EtOAc. The combined organic phase was extracted with 0.2 M HCl (20 mL), H<sub>2</sub>O (20 mL) and brine (20 mL). The organic layer was dried over MgSO<sub>4</sub>, filtered, and the solvent was removed under reduced pressure. The product was used in the next step without further purification. <sup>1</sup>H NMR (400 MHz, acetone-d<sub>6</sub>) δ 7.95 (d, *J* = 8.9 Hz, 4H), 7.20 (t, *J* = 7.9 Hz, 2H), 7.05-6.91 (m, 8H), 6.81 (dd, *J*<sub>1</sub> = 8.3 Hz, *J*<sub>2</sub> = 1.9 Hz, 2H), 4.91 (ddd, *J*<sub>1</sub> = 22.1 Hz, *J*<sub>2</sub> = 12.8 Hz, *J*<sub>3</sub> = 7.6 Hz, 4H), 4.25-4.13 (m, 2H), 4.13 (dd, *J*<sub>1</sub> = 12.4 Hz, *J*<sub>2</sub> = 7.8 Hz, 4H), 3.85 (d, *J* = 4.8 Hz, 4H), 3.84 (s, 6H), 3.49 (qd, *J*<sub>1</sub> = 17.7 Hz, *J*<sub>2</sub> = 7.0 Hz, 4H). <sup>13</sup>C NMR (100 MHz, acetone-d<sub>6</sub>) δ 195.3, 163.8, 159.2, 141.9, 130.3, 129.9, 129.7, 120.2, 114.3, 113.8, 113.2, 79.6, 69.6, 67.4, 55.1, 41.0, 39.7, 29.0. HRMS (ESI) calcd for C<sub>38</sub>H<sub>40</sub>N<sub>2</sub>O<sub>11</sub> {M+H}<sup>+</sup> 701.2710, found 701.2683.



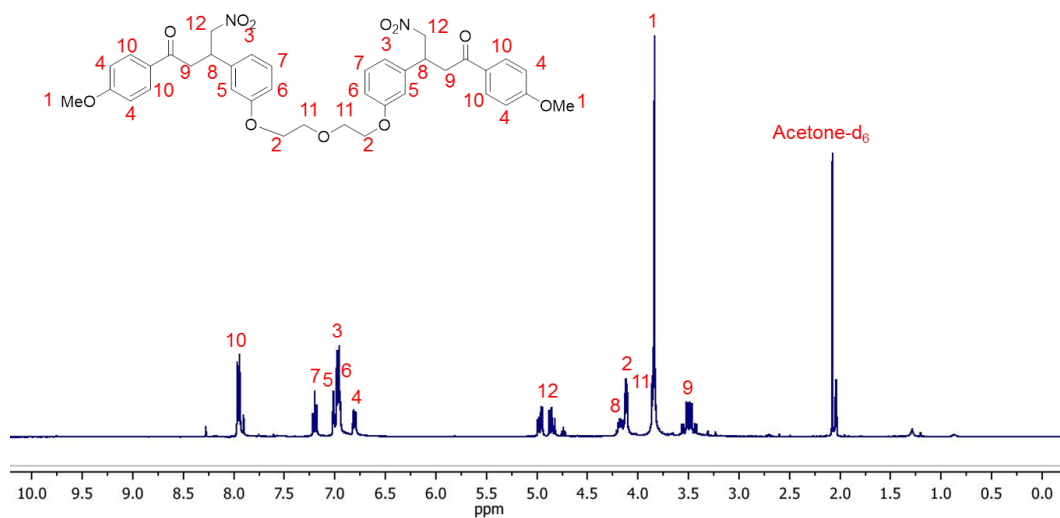

$^1\text{H-NMR}$  of compound 5a

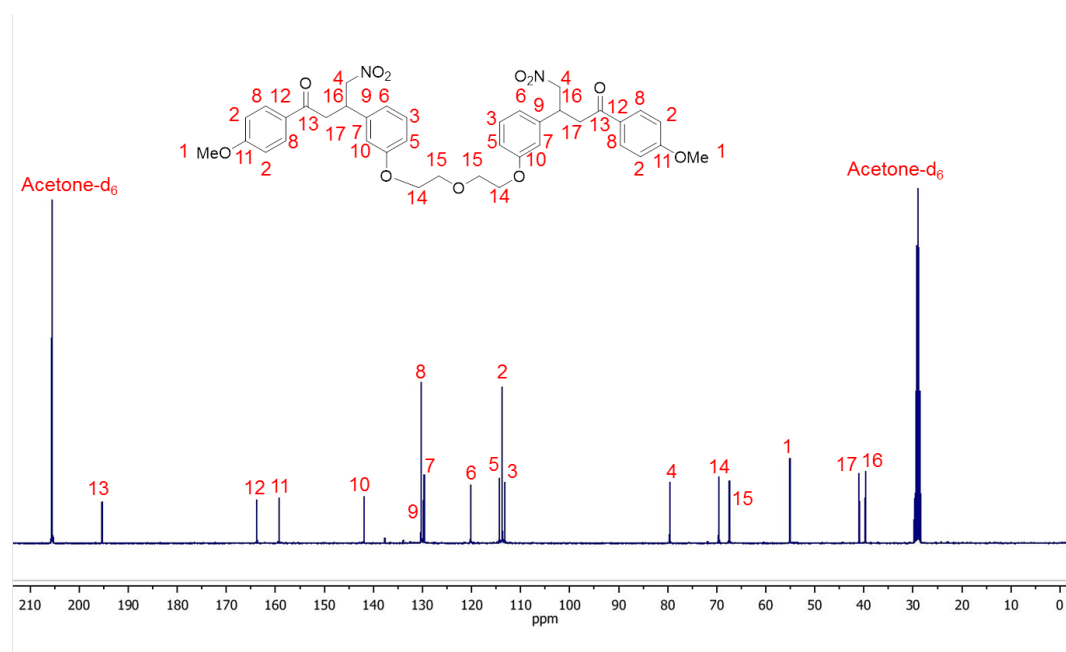

$^{13}\text{C-NMR}$  of compound 5a

**Target Strapped aza-BODIPY 1a (n = 1).** **5a** (1.20 g, 2.69 mmol), ammonium acetate (4.10 g, 53.8 mmol) and <sup>n</sup>BuOH (20 mL) were heated under reflux for 24 h. The reaction was allowed to cool to room temperature and solvent was removed. Cold methanol was added to the residue and product was filtrated to give dark blue solid. The dark blue solid (300 mg, 0.49 mmol) and diisopropylethylamine (0.63 mL, 4.90 mmol) were dissolved in dry CH<sub>2</sub>Cl<sub>2</sub> (20 mL) and stirred at room temperature for 30 min. BF<sub>3</sub>•OEt<sub>2</sub> (0.89 mL, 7.35 mmol) was added and the mixture was stirred at room temperature under argon for 24 h. The mixture was washed with water and the organic layer was separated, dried over MgSO<sub>4</sub> and evaporated to dryness. The residue was purified by flash silica column chromatography eluting with hexanes:EtOAc (2:1) to give a green solid to yield 43.6 mg (14%). <sup>1</sup>H NMR (400 MHz, CDCl<sub>3</sub>) δ 8.09 (d, *J* = 8.9 Hz, 4H), 7.95 (s, 2H), 7.25-7.40 (m, 4H), 7.07 – 6.97 (m, 6H), 6.95 (dd, *J*<sub>1</sub> = 8.0 Hz, *J*<sub>2</sub> = 1.8 Hz, 2H), 4.26 (t, *J* = 4 Hz, 4H), 4.05 (t, *J* = 4 Hz, 4H), 3.91 (s, 6H). <sup>13</sup>C NMR (100 MHz, CDCl<sub>3</sub>) δ 162.0, 159.0, 158.0, 145.3, 143.8, 134.0, 131.7, 129.4, 128.4, 124.2, 120.7, 119.9, 117.4, 114.3, 114.2, 113.6, 70.4, 67.4, 55.4. Hi-Res MALDI-MS: *m/z* calcd for C<sub>38</sub>H<sub>32</sub>BF<sub>2</sub>N<sub>3</sub>O<sub>5</sub> {M+H}<sup>+</sup> 660.2482, found 660.2487.

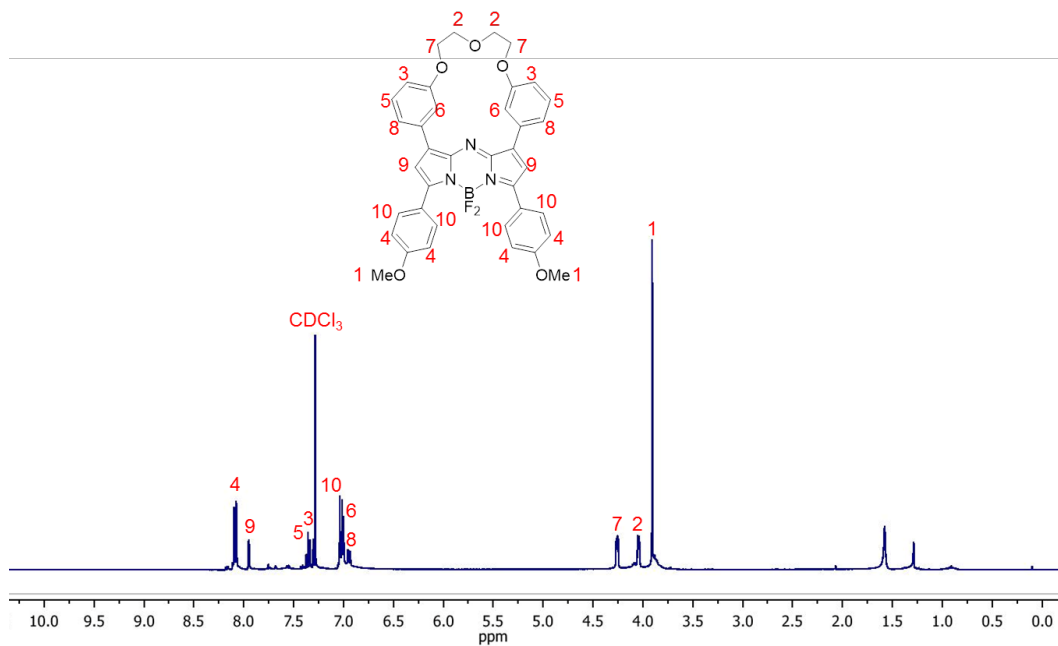

<sup>1</sup>H-NMR of compound 1a

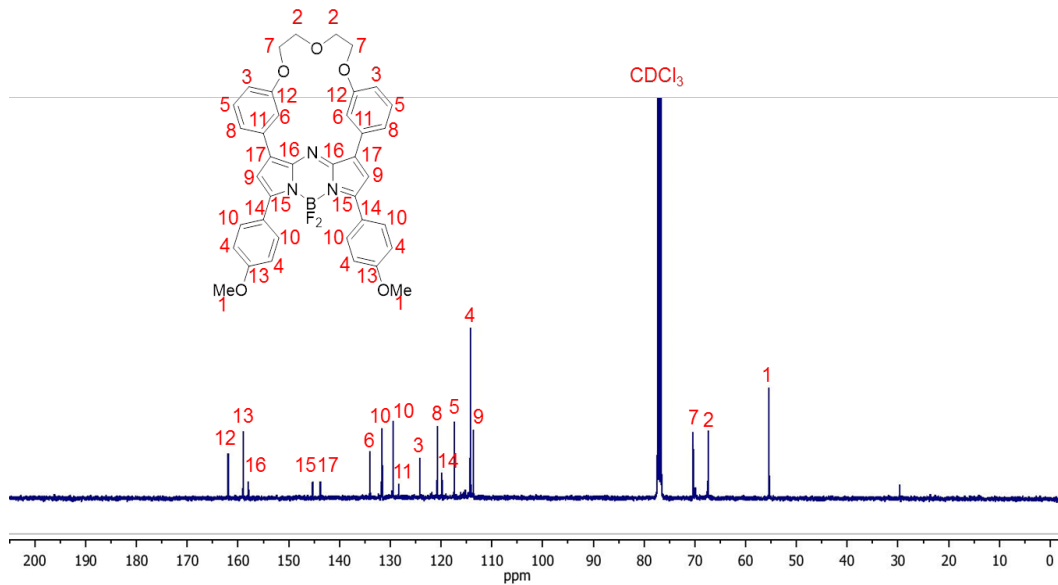

<sup>13</sup>C-NMR of compound 1a

**Linked Dichalcone (4b).** Potassium carbonate (970 mg, 7.03 mmol) was added to a solution of **3** (1.36 g, 5.35 mmol) and bis[2-(2-chloroethoxy)ethyl] ether (0.4 mL, 1.97 mmol) in tetrahydrofuran (15 mL). Tetrabutylammonium iodide was added in small amount to the mixture solution. The reaction mixture was refluxed at 85 °C for 60 h. Then solvent was removed under vacuum. The residue was redissolved in ethyl acetate and extracted with 0.2 N NaOH (2 x 30 mL) and H<sub>2</sub>O (2 x 30 mL). The organic layer was dried over MgSO<sub>4</sub>, filtered, and the solvent was removed under reduced pressure. The residue was purified by flash silica chromatography eluting with hexanes:EtOAc (2:1 to 1:3) to yield 980 mg (72 %) of **4b** as a yellow oil. <sup>1</sup>H NMR (400 MHz, CDCl<sub>3</sub>) δ 8.05 (d, *J* = 8.8 Hz, 4H), 7.76 (d, *J* = 16.0 Hz, 2H), 7.52 (d, *J* = 16.0 Hz, 2H), 7.31 (dd, *J*<sub>1</sub> = 16.0 Hz, *J*<sub>2</sub> = 8.0 Hz, 2H), 7.24 (d, *J* = 7.6 Hz, 2H), 7.20 (s, 2H), 7.02-6.95 (m, 6H), 4.19 (t, *J* = 4.8 Hz, 4H), 3.92-3.88 (m, 10H), 3.80-3.70 (m, 8H). <sup>13</sup>C NMR (100 MHz, CDCl<sub>3</sub>) δ 188.6, 163.5, 159.2, 143.3, 136.5, 131.1, 130.8, 129.9, 122.3, 121.3, 116.7, 114.2, 113.9, 70.9, 70.7, 69.7, 67.6, 55.5. HRMS (ESI) calcd for C<sub>40</sub>H<sub>42</sub>O<sub>9</sub> {M+H}<sup>+</sup> 667.2907, found 667.2920.

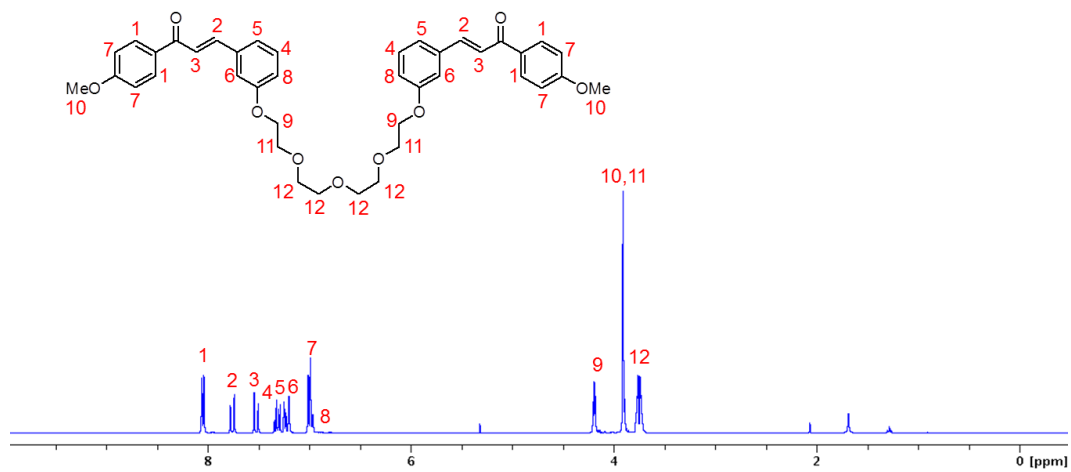

**<sup>1</sup>H-NMR of compound 4b**

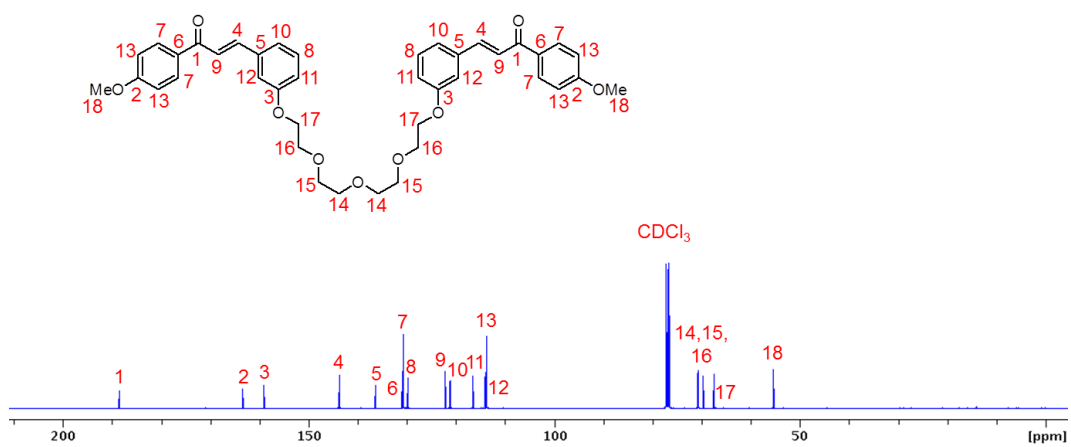

**<sup>13</sup>C-NMR of compound 4b**

**Conjugate Addition Product 5b.** **4b** (650 mg, 0.98 mmol), nitromethane (1.80 mL, 33 mmol) and potassium hydroxide (0.16 g, 2.86 mmol) were dissolved in methanol (10 mL) and heated under reflux for 24 h. The reaction mixture was cooled and solvent was removed. The residue was dissolved in ethyl acetate and extracted with 0.2 M HCl (2 × 30 mL). The aqueous phase was extracted with EtOAc. The combined organic phase was extracted with 0.2 M HCl (30 mL), H<sub>2</sub>O (30 mL) and brine (30 mL). The organic layer was dried over MgSO<sub>4</sub>, filtered, and the solvent was removed under reduced pressure. The residue was purified by flash silica column chromatography eluting with hexanes:EtOAc (1:3) to yield 775 mg (72 %) of **5b** as a brown oil. <sup>1</sup>H NMR (400 MHz, CDCl<sub>3</sub>) δ 7.86 (d, *J* = 8.8 Hz, 4H), 7.19 (t, *J* = 7.8 Hz, 2H), 6.92-6.74 (m, 10H), 4.78 (dd, *J*<sub>1</sub> = 12.4 Hz, *J*<sub>2</sub> = 6.2 Hz, 2H), 4.64 (dd, *J*<sub>1</sub> = 12.8 Hz, *J*<sub>2</sub> = 8.0 Hz, 2H), 4.17-4.03 (m, 6H), 3.86-3.78 (m, 10H), 3.71-3.62 (m, 8H), 3.38-3.26 (m, 4H). <sup>13</sup>C NMR (100 MHz, CDCl<sub>3</sub>) δ 195.3, 163.8, 159.2, 141.0, 130.3, 130.0, 129.5, 119.9, 114.4, 113.9, 113.5, 79.5, 70.8, 70.6, 69.7, 67.4, 55.5, 41.1, 39.4. HRMS (ESI) calcd for C<sub>42</sub>H<sub>48</sub>N<sub>2</sub>O<sub>13</sub> {M+H}<sup>+</sup> 789.3235, found 789.3254 .

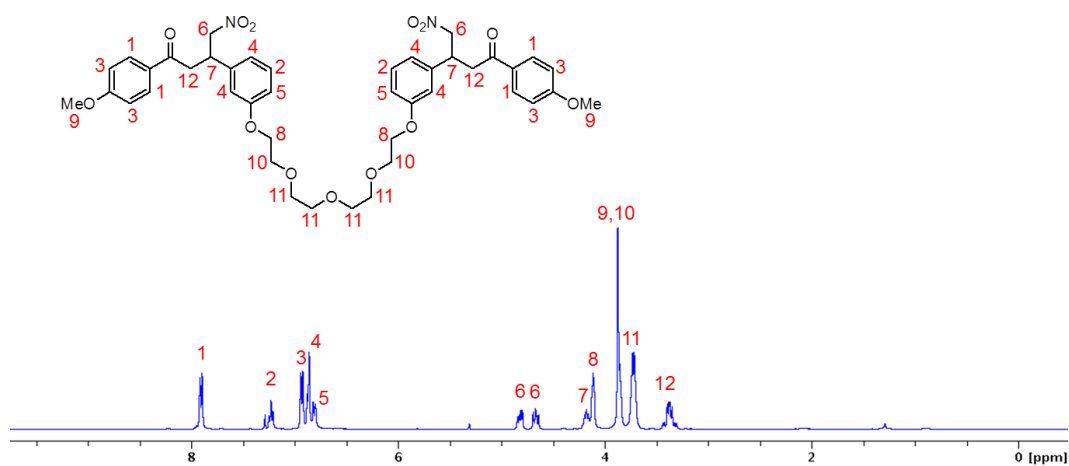

**<sup>1</sup>H-NMR of compound 5b**

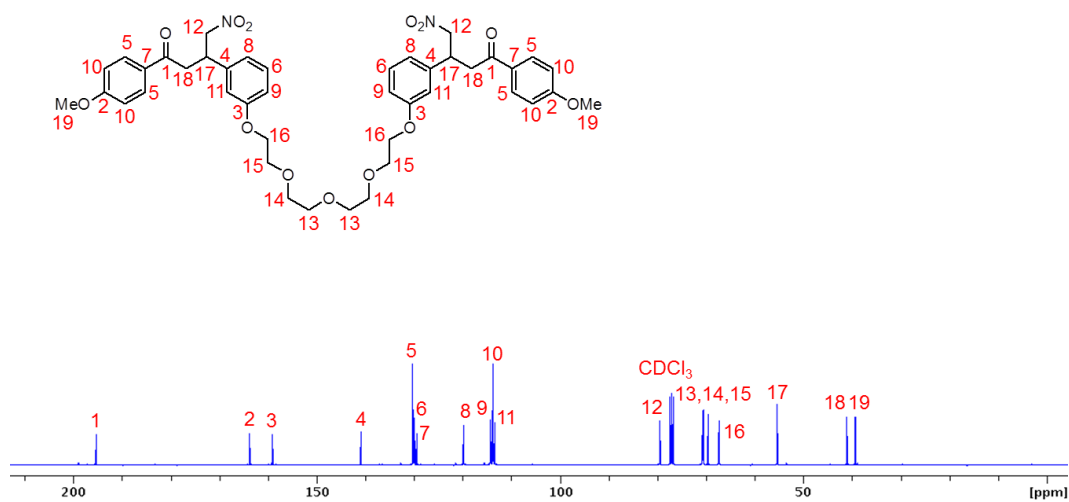

**<sup>13</sup>C-NMR of compound 5b**

**Target Strapped aza-BODIPY 1b (n = 3).** **5b** (307 mg, 0.39 mmol), ammonium acetate (1.19 g, 15.44 mmol) and <sup>n</sup>BuOH (15 mL) were heated under reflux for 24 h. The reaction was allowed to cool to room temperature and solvent was removed. The residue was dissolved in dichloromethane and extracted with H<sub>2</sub>O (2 × 30 mL) and brine (30 mL). The organic layer was dried over MgSO<sub>4</sub>, filtered, and the solvent was removed under reduced pressure to give dark blue solid and was used in the next step without further purification. The dark blue solid and diisopropylethylamine (0.68 mL, 3.90 mmol) were dissolved in dry CH<sub>2</sub>Cl<sub>2</sub> (10 mL) and stirred at room temperature for 30 min. BF<sub>3</sub>•OEt<sub>2</sub> (0.74 mL, 5.88 mmol) was added and the mixture was stirred at room temperature under argon for 24 h. The organic layer was extracted with 0.2 M HCl (2 × 30 mL), sat. NaHCO<sub>3</sub> (2 × 30 mL) and brine (30 mL). The organic layer was dried over MgSO<sub>4</sub>, filtered, and the solvent was removed under reduced pressure. The residue was purified by flash silica column chromatography eluting with hexanes:EtOAc (3:1) to give a green solid to yield 8 mg (3%) <sup>1</sup>H NMR (400 MHz, CDCl<sub>3</sub>) δ 8.11 (d, *J* = 8.8 Hz, 4H), 7.63 (s, 2H), 7.46 (d, *J* = 7.6, 2H), 7.37 (t, *J* = 7.8 Hz, 2H), 7.10-7.00 (m, 8H), 4.04 (t, *J*<sub>1</sub> = 4.6 Hz, 4H), 3.91 (s, 6H), 3.85 (t, *J*<sub>1</sub> = 4.6 Hz, 4H), 3.73 (br, 8H). <sup>13</sup>C NMR (100 MHz, CDCl<sub>3</sub>) δ 162.0, 159.1, 158.1, 145.4, 143.5, 133.8, 131.6, 129.5, 124.2, 121.8, 119.1, 116.7, 115.0, 114.3, 71.1, 70.9, 69.8, 67.6, 55.4. Hi-Res MALDI-MS: *m/z* calcd for C<sub>42</sub>H<sub>40</sub>BF<sub>2</sub>N<sub>3</sub>O<sub>7</sub> {M+H}<sup>+</sup> 748.3000, found 748.3035.



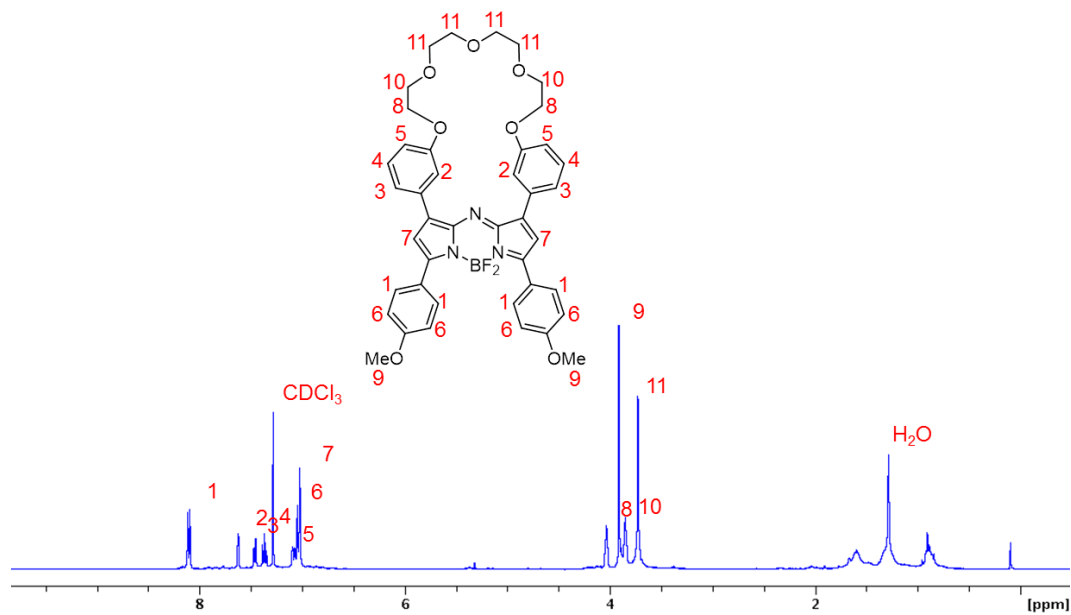

<sup>1</sup>H-NMR of compound 1b

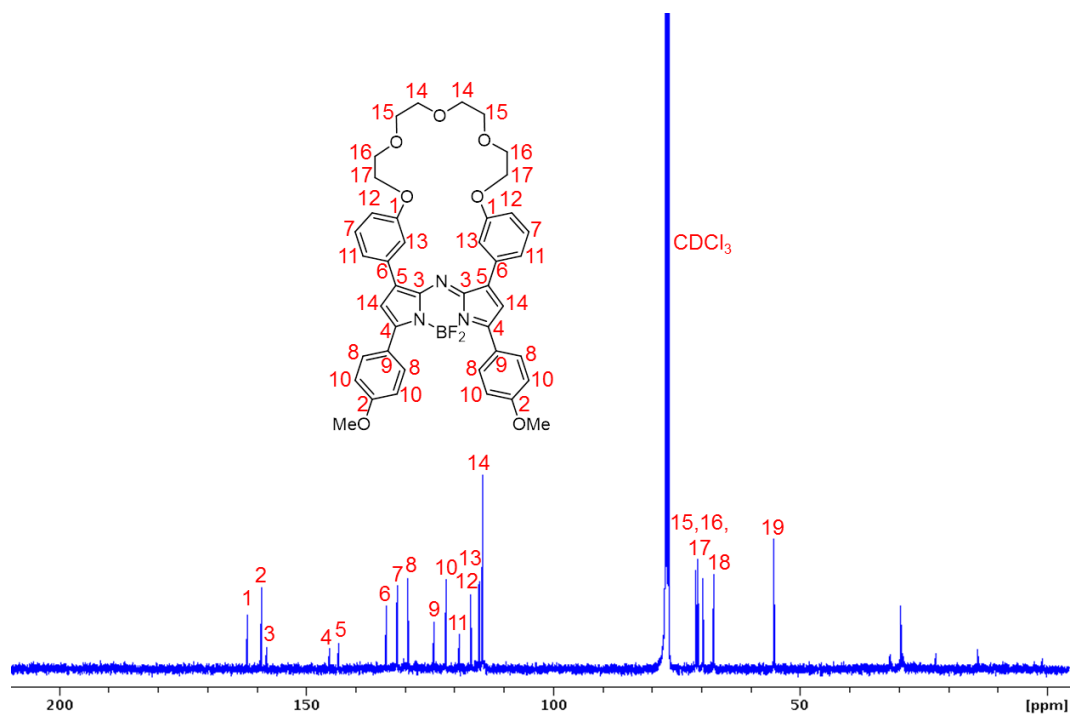

<sup>13</sup>C-NMR of compound 1b

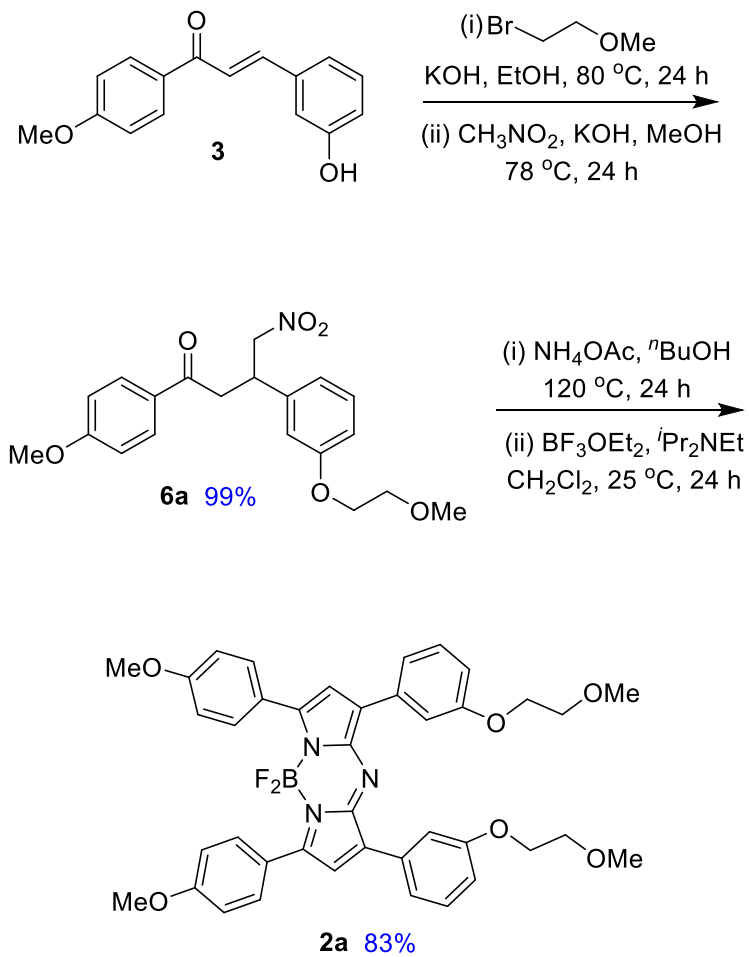

**Scheme S1.** Syntheses of the non-macrocyclic control molecule **2a**.

**3-(3-(2-Methoxyethoxy)phenyl)-1-(4-methoxyphenyl)-4-nitrobutan-1-one**

**(6a).** A potassium hydroxide in ethanol (10%, 2 mL) was slowly added to a solution of **3** (1.00 g, 3.93 mmol) and 2-bromo ethyl methyl ether (0.45 mL, 4.79 mmol) in ethanol (6 mL). The reaction mixture was heated at reflux for 24 h. Then solvent was removed under vacuum. The residue was dissolved in ethyl acetate and extracted with H<sub>2</sub>O (2 × 30 mL). The organic phase was dried over MgSO<sub>4</sub>, filtered, and the solvent was removed under reduced pressure. The crude product was used in the next step without further purification. The yellow oil, nitromethane (3.90 mL, 72.84 mmol) and potassium hydroxide (230 mg, 4.10 mmol) were dissolved in methanol (20 mL) and heated under reflux for 24 h. The reaction mixture was cooled and solvent was removed. The residue was dissolved in ethyl acetate and extracted with 0.2 M HCl (2 × 30 mL). The aqueous phase was extracted with EtOAc. The combined organic phase was extracted with 0.2 M HCl (30 mL), and brine (30 mL). The organic layer was dried over MgSO<sub>4</sub>, filtered, and the solvent was removed under reduced pressure to afford 1.47 g (99 %) of **6a** as a brown oil. <sup>1</sup>H NMR (400 MHz, CDCl<sub>3</sub>) δ 7.90 (d, *J* = 9.2 Hz, 2H), 7.23 (t, *J* = 8.2 Hz, 1H), 6.95-6.78 (m, 5H), 4.81 (dd, *J*<sub>1</sub> = 12.4 Hz, *J*<sub>2</sub> = 6.4 Hz, 1H), 4.66 (dd, *J*<sub>1</sub> = 12.6 Hz, *J*<sub>2</sub> = 8.2 Hz, 1H), 4.22-4.08 (m, 3H), 3.86 (s, 3H), 3.75 (t, *J* = 4.6, 2H), 3.46 (s, 3H), 3.44-3.27 (m, 2H). <sup>13</sup>C NMR (100 MHz, CDCl<sub>3</sub>) δ 195.7, 163.9, 159.1, 141.0, 130.4, 130.0, 129.4, 120.0, 114.4, 113.9, 113.4, 79.6, 71.0, 67.1, 59.1, 55.5, 41.1, 39.4. HRMS (ESI) calcd for C<sub>20</sub>H<sub>23</sub>NO<sub>6</sub> {M+H}<sup>+</sup> 374.1604, found 374.1617.

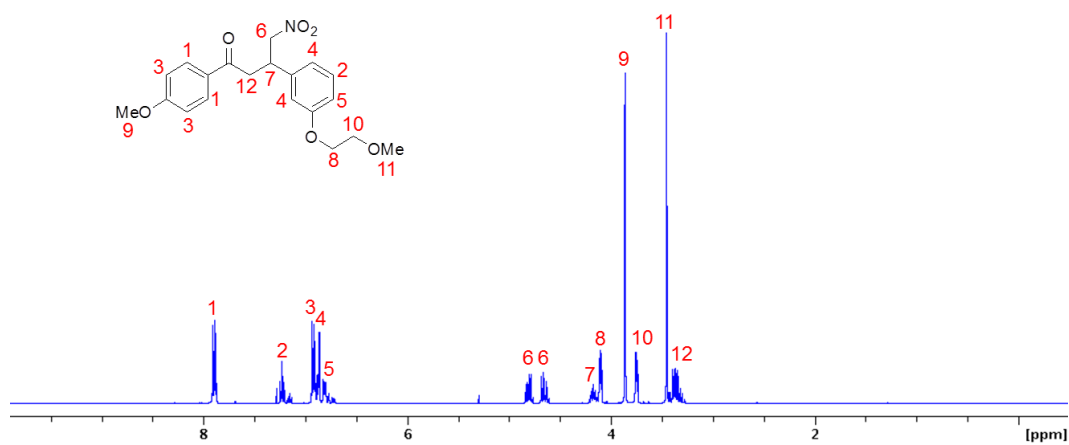

**<sup>1</sup>H-NMR of compound 6a**

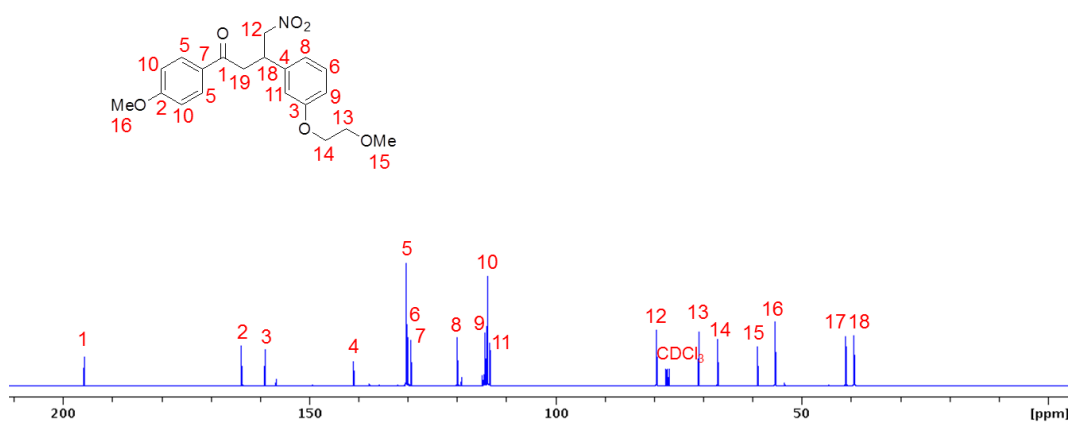

**<sup>13</sup>C-NMR of compound 6a**

**Control PEG-Substituted aza-BODIPY 2a. 6a** (500 mg, 1.27 mmol), ammonium acetate (2.70 g, 35.0 mmol) and <sup>n</sup>BuOH (15 mL) were heated under reflux for 24 h. The reaction was allowed to cool to room temperature and solvent was removed. Cold methanol was added to the residue and product was filtrated to yield 190 mg (45%) as a dark blue solid. Then dark blue solid (50 mg, 0.076 mmol) and diisopropylethylamine (0.13 mL, 0.76 mmol) were dissolved in dry CH<sub>2</sub>Cl<sub>2</sub> (6 mL) and stirred at room temperature for 30 min. BF<sub>3</sub>•OEt<sub>2</sub> (0.14 mL, 1.14 mmol) was then added in portions and the mixture was stirred at 25 °C for 24 h. The organic layer was extracted with 0.2 M HCl (2 × 30 mL), sat. NaHCO<sub>3</sub> (2 × 30 mL) and brine (30 mL). The organic layer was dried over MgSO<sub>4</sub>, filtered, and the solvent was removed under reduced pressure. The residue was purified by flash silica column chromatography eluting with hexanes:EtOAc (1:1) to give a green solid to yield 44.3 mg (83%). <sup>1</sup>H NMR (400 MHz, CDCl<sub>3</sub>) δ 8.10 (d, *J* = 8.8 Hz, 4H), 7.66 (d, *J* = 8.0 Hz, 2H), 7.61 (s, 2H), 7.39 (t, *J* = 8.0, Hz, 2H), 7.08 – 6.97 (m, 8H), 4.10 (t, *J* = 4.6 Hz, 4H), 3.91 (s, 6H), 3.74 (t, *J* = 2.4 Hz, 4H), 3.47 (s, 6H). <sup>13</sup>C NMR (100 MHz, CDCl<sub>3</sub>) δ 162.0, 159.0, 158.1, 145.3, 143.1, 133.8, 131.7, 129.6, 124.1, 122.1, 119.0, 115.9, 115.0, 114.3, 71.0, 67.3, 59.2, 55.4. HRMS (ESI) calcd for C<sub>40</sub>H<sub>38</sub>BF<sub>2</sub>N<sub>3</sub>O<sub>6</sub> {M+H}<sup>+</sup> 706.2900, found 706.2875.

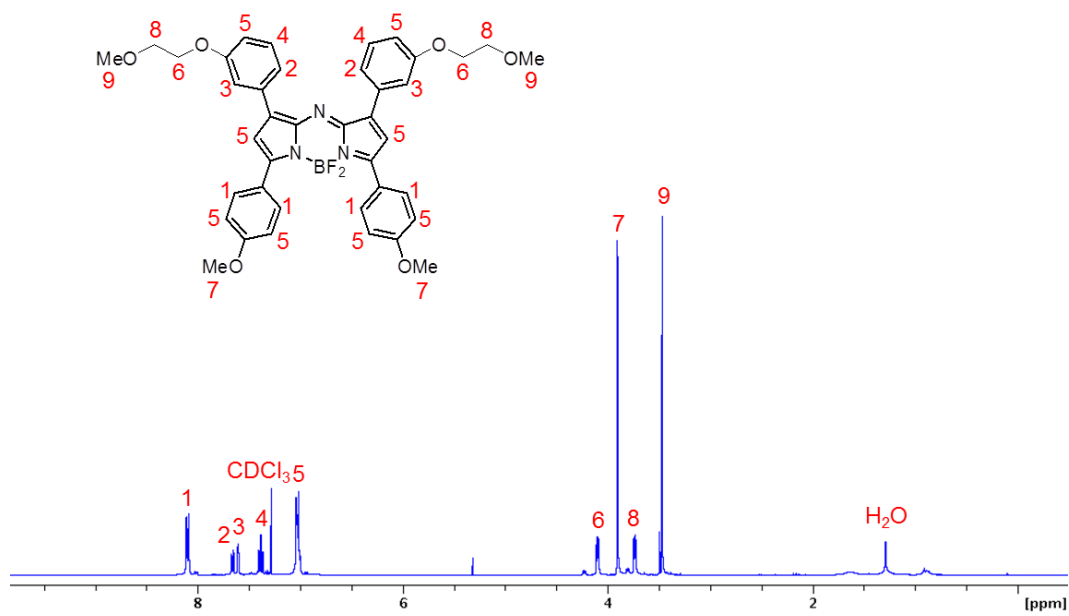

<sup>1</sup>H-NMR of compound 2a

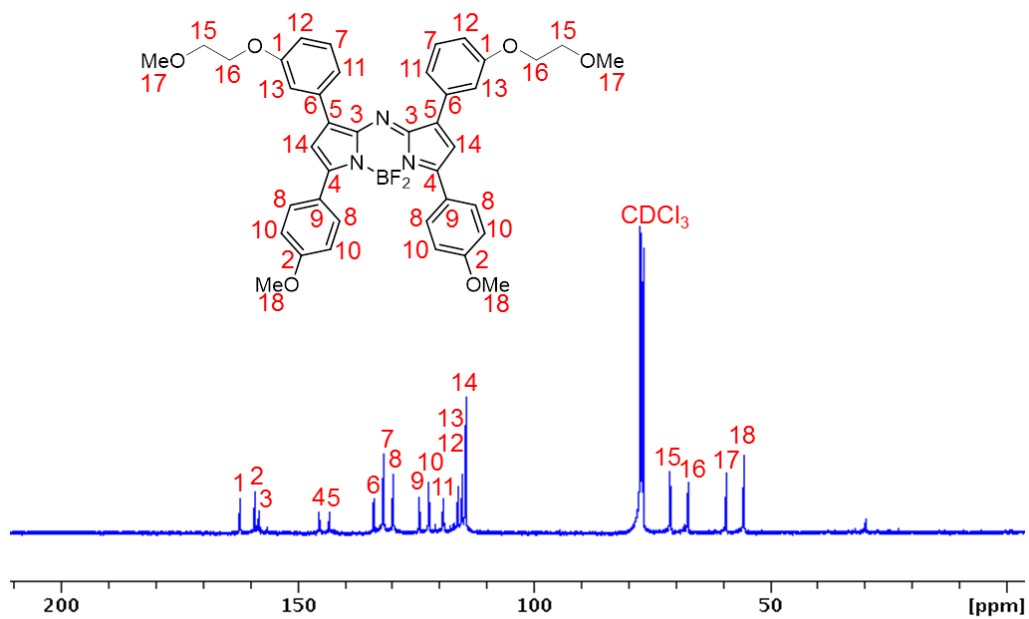

<sup>13</sup>C-NMR of compound 2a

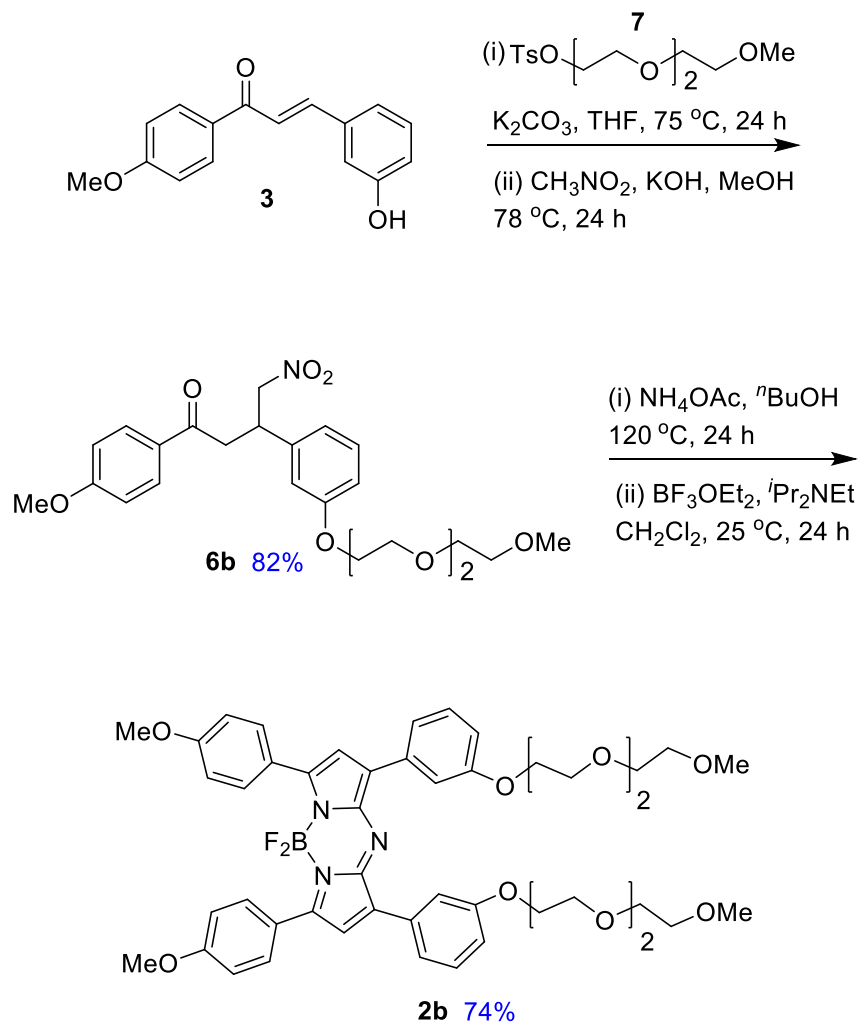

**Scheme S2.** Syntheses of the non-macrocyclic control molecule **2b**.

**Conjugate Addition Product 6b.** Potassium carbonate (260 mg, 1.88 mmol) was added to a solution of **3** (173 mg, 0.68 mmol) and compound **7**<sup>[1]</sup> (200 mg, 0.64 mmol) in tetrahydrofuran (15 mL). The reaction mixture was heated at reflux for 24 h. Then solvent was removed under vacuum. The residue was redissolved in ethyl acetate and extracted with 0.2 M NaOH (2 x 30 mL), 0.2 M HCl (2 x 30 mL). The organic layer was dried over MgSO<sub>4</sub>, filtered, and the solvent was removed under reduced pressure. The crude product was used in the next step without further purification. The yellow oil, nitromethane (1.0 mL, 18.7 mmol) and potassium hydroxide (160 mg, 2.86 mmol) were dissolved in methanol (8 mL) and heated under reflux for 24 h. The reaction mixture was cooled and solvent was removed. The residue was dissolved in ethyl acetate and extracted with 0.2 M HCl (2 x 30 mL). The aqueous phase was extracted with EtOAc. The combined organic phase was extracted with 0.2 M HCl (30 mL), H<sub>2</sub>O (30 mL) and brine (30 mL). The organic layer was dried over MgSO<sub>4</sub>, filtered, and the solvent was removed under reduced pressure. The residue was purified by flash silica column chromatography eluting with hexanes:EtOAc (1:1 to 1:2) to yield 240 mg (82 %) of **6b** as a brown oil. <sup>1</sup>H NMR (400 MHz, CDCl<sub>3</sub>) δ 7.83 (d, *J* = 8.8 Hz, 2H), 7.16 (t, *J* = 8.0 Hz, 1H), 6.89-6.71 (m, 5H), 4.75 (dd, *J*<sub>1</sub> = 12.4 Hz, *J*<sub>2</sub> = 6.4 Hz, 1H), 4.59 (dd, *J*<sub>1</sub> = 12.2 Hz, *J*<sub>2</sub> = 8.4 Hz, 1H), 4.14-4.01 (m, 3H), 3.81-3.74 (m, 5H), 3.69-3.56 (m, 6H), 3.52-3.46 (m, 2H), 3.36-3.21 (m, 5H). <sup>13</sup>C NMR (100 MHz, CDCl<sub>3</sub>) δ 195.3, 163.8, 159.2, 141.0, 130.3, 130.0 (2), 129.5, 119.9, 114.4, 113.9, 113.4, 79.5, 71.9, 70.8, 70.6, 70.5, 69.7, 67.4, 58.9, 55.5, 41.1, 39.4. HRMS (ESI) calcd for C<sub>24</sub>H<sub>31</sub>NO<sub>8</sub> {M+H}<sup>+</sup> 462.2128, found 462.2141.



[1] K. M. Bonger *et al. Bioorg. Med. Chem.* 15 (2007) 4841-4856.

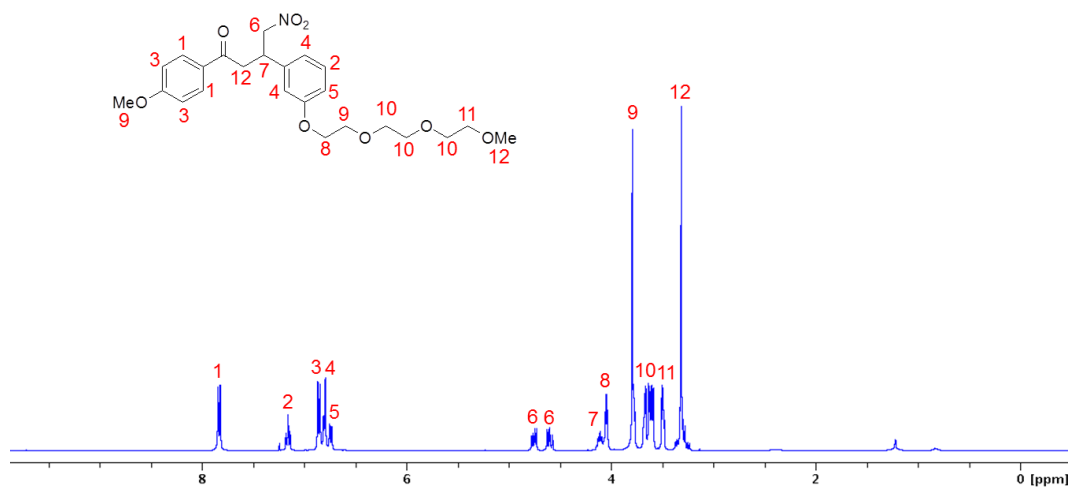

<sup>1</sup>H-NMR of compound 6b

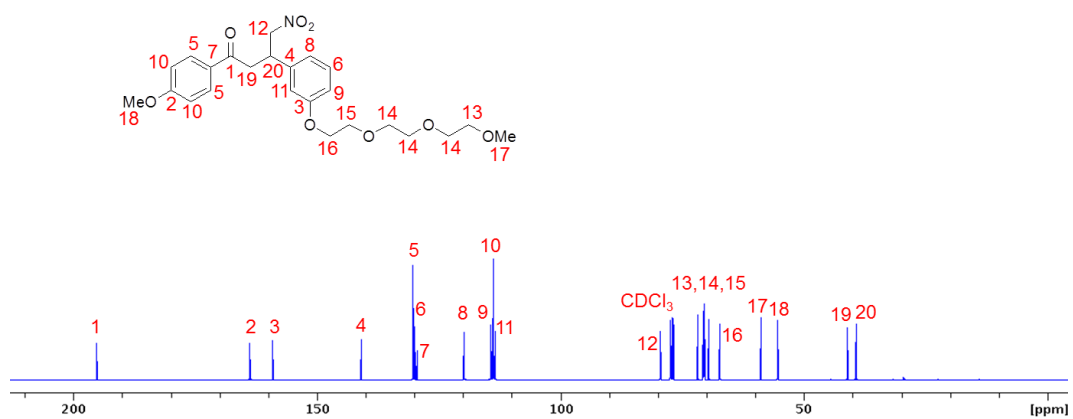

<sup>13</sup>C-NMR of compound 6b

**Control PEG-substituted Compound 2b. 6b** (24 mg, 0.052 mmol), ammonium acetate (190 mg, 2.46 mmol) and <sup>n</sup>BuOH (2 mL) were heated under reflux for 24 h. The reaction was allowed to cool to room temperature and solvent was removed. The residue was dissolved in dichloromethane and extracted with H<sub>2</sub>O (2 × 30 mL) and brine (30 mL). The organic layer was dried over MgSO<sub>4</sub>, filtered, and the solvent was removed under reduced pressure. The residue was purified by flash column chromatography (silica) with hexanes:EtOAc (1:3 to 1:7) to give a dark blue solid to yield 12.5 mg (58%). The dark blue solid (9.8 mg, 0.012 mmol) and diisopropylethylamine (0.1 mL, 0.57 mmol) were dissolved in dry CH<sub>2</sub>Cl<sub>2</sub> (1 mL) and stirred at room temperature for 30 min. BF<sub>3</sub>•OEt<sub>2</sub> (0.1 mL, 0.79 mmol) was added and the mixture was stirred at room temperature under argon for 24 h. The organic layer was extracted with 0.2 M HCl (2 × 30 mL), sat. NaHCO<sub>3</sub> (2 × 30 mL) and brine (30 mL). The organic layer was dried over MgSO<sub>4</sub>, filtered, and the solvent was removed under reduced pressure. The residue was purified by flash column chromatography (silica) with MeOH:CH<sub>2</sub>Cl<sub>2</sub> (1:99) to give a green solid to yield 7.7 mg (74%). <sup>1</sup>H NMR (400 MHz, CDCl<sub>3</sub>) δ 8.06 (d, *J* = 8.8 Hz, 4H), 7.62 (d, *J* = 8.0 Hz, 2H), 7.55 (s, 2H), 7.34 (t, *J* = 7.8, 2H), 7.02-6.93 (m, 8H), 4.08 (t, *J*<sub>1</sub> = 4.8 Hz, 4H), 3.86 (s, 6H), 3.80 (t, *J*<sub>1</sub> = 4.8 Hz, 4H), 3.72-3.61 (m, 12H), 3.54-3.50 (m, 4H), 3.35 (s, 6H). <sup>13</sup>C NMR (100 MHz, CDCl<sub>3</sub>) δ 162.0, 159.0, 158.0, 145.3, 143.0, 133.8, 131.7, 129.6, 124.1, 122.1, 119.0, 115.9, 115.0, 114.3, 71.9, 70.8, 70.6(2), 69.7, 67.5, 60.0, 55.4. HRMS (ESI) calcd for C<sub>48</sub>H<sub>54</sub>BF<sub>2</sub>N<sub>3</sub>O<sub>10</sub> {M+H}<sup>+</sup> 882.3949, found 882.3972.

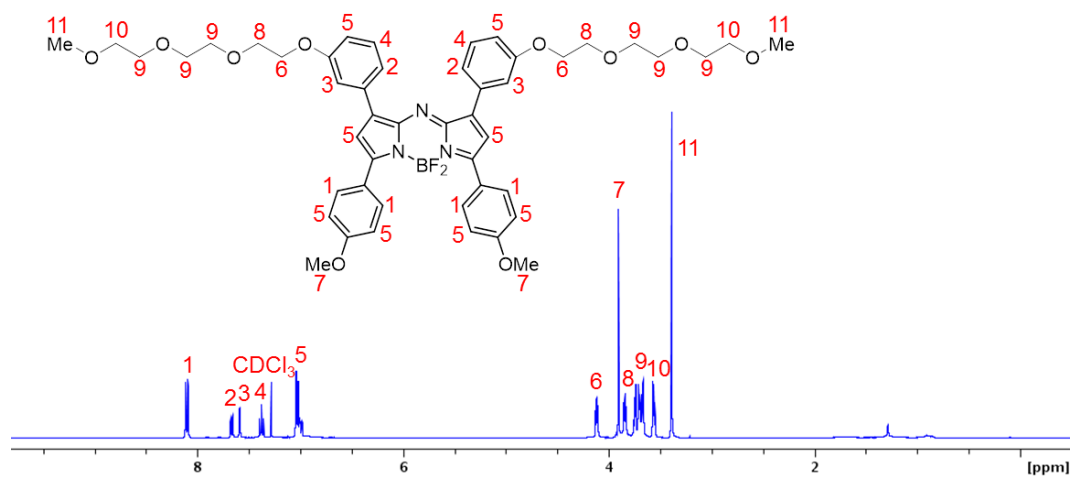**<sup>1</sup>H-NMR of compound 2b**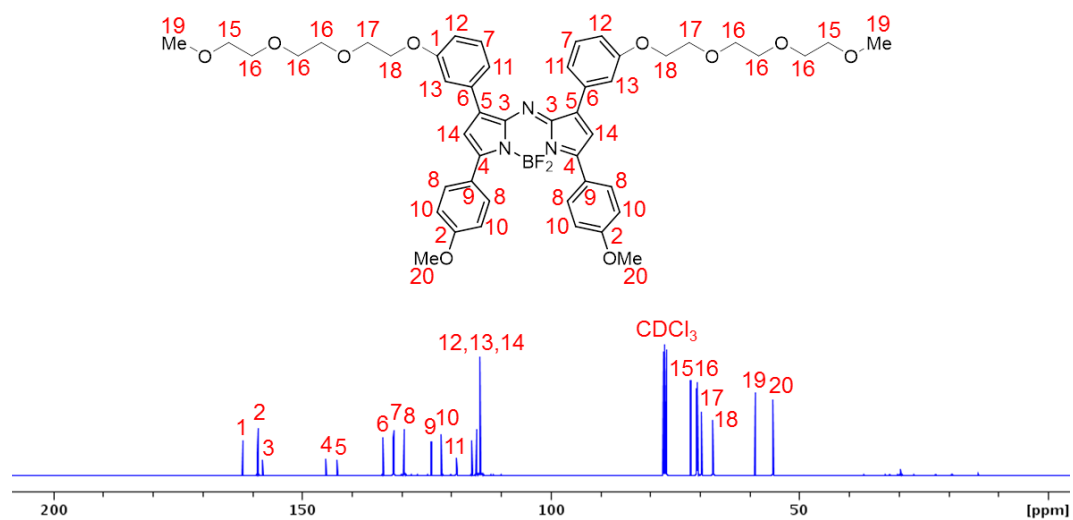**<sup>13</sup>C-NMR of compound 2b**

## 4. Relative Yield Experiments

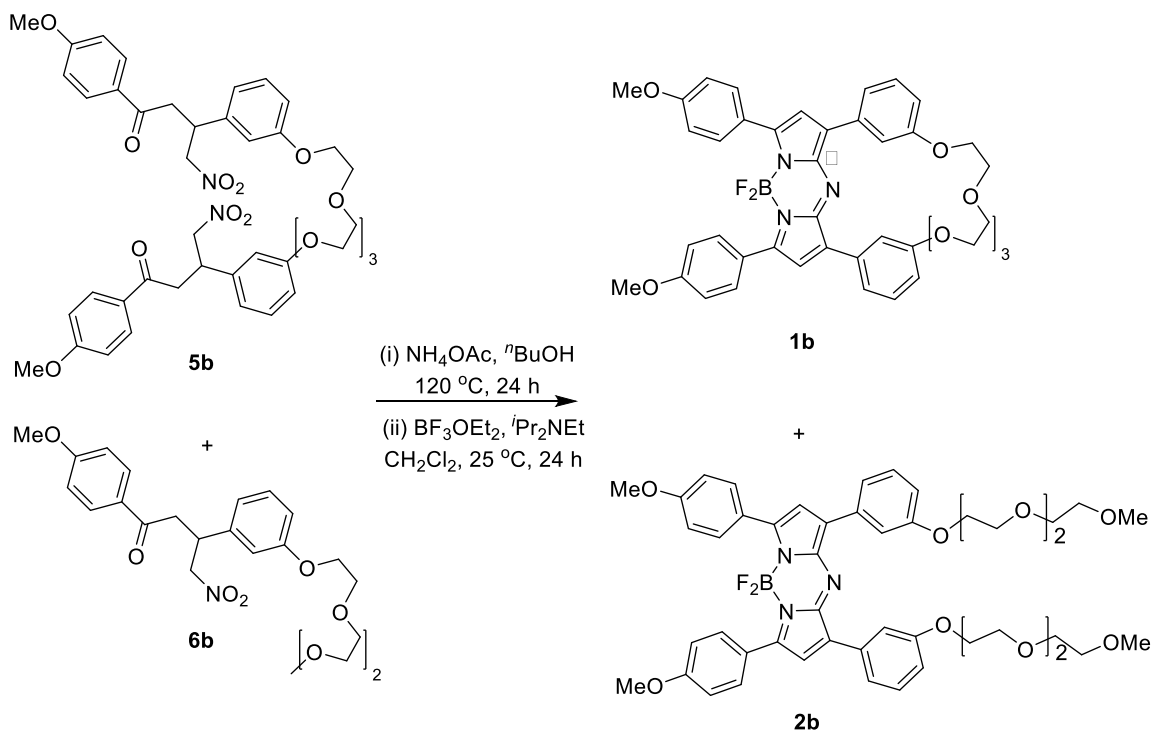

The following procedure was used to determine the relative yields of aza-dipyrromethene precursors to **1b** and **2b**. In step (i) **5b** (76 mg, 0.096 mmol), **6b** (89 mg, 0.193 mmol), ammonium acetate (445 mg, 5.77 mmol) and  ${}^n\text{BuOH}$  (15 mL) were heated under reflux for 24 h and the crude product was monitored by analytical HPLC. The reaction was allowed to cool to room temperature and solvent was removed. The residue was dissolved in dichloromethane and extracted with  $\text{H}_2\text{O}$  ( $2 \times 30\text{ mL}$ ) and brine (30 mL). The organic layer was dried over  $\text{MgSO}_4$ , filtered, and the solvent was removed under reduced pressure to give dark blue solid and was used in the next step without further purification. In step (ii) the dark blue solid and diisopropylethylamine (0.46 mL, 2.64 mmol) were dissolved in dry  $\text{CH}_2\text{Cl}_2$  (10 mL) and stirred at room temperature for 30 min.  $\text{BF}_3\cdot\text{OEt}_2$  (0.5 mL, 3.97 mmol) was added and the mixture was stirred at room

temperature under argon for 24 h and the crude product was monitored by analytical HPLC. The organic layer was extracted with 0.2 M HCl (2 × 30 mL), sat. NaHCO<sub>3</sub> (2 × 30 mL) and brine (30 mL). The organic layer was dried over MgSO<sub>4</sub>, filtered, and the solvent was removed under reduced pressure. This reaction was not purified because of complication.

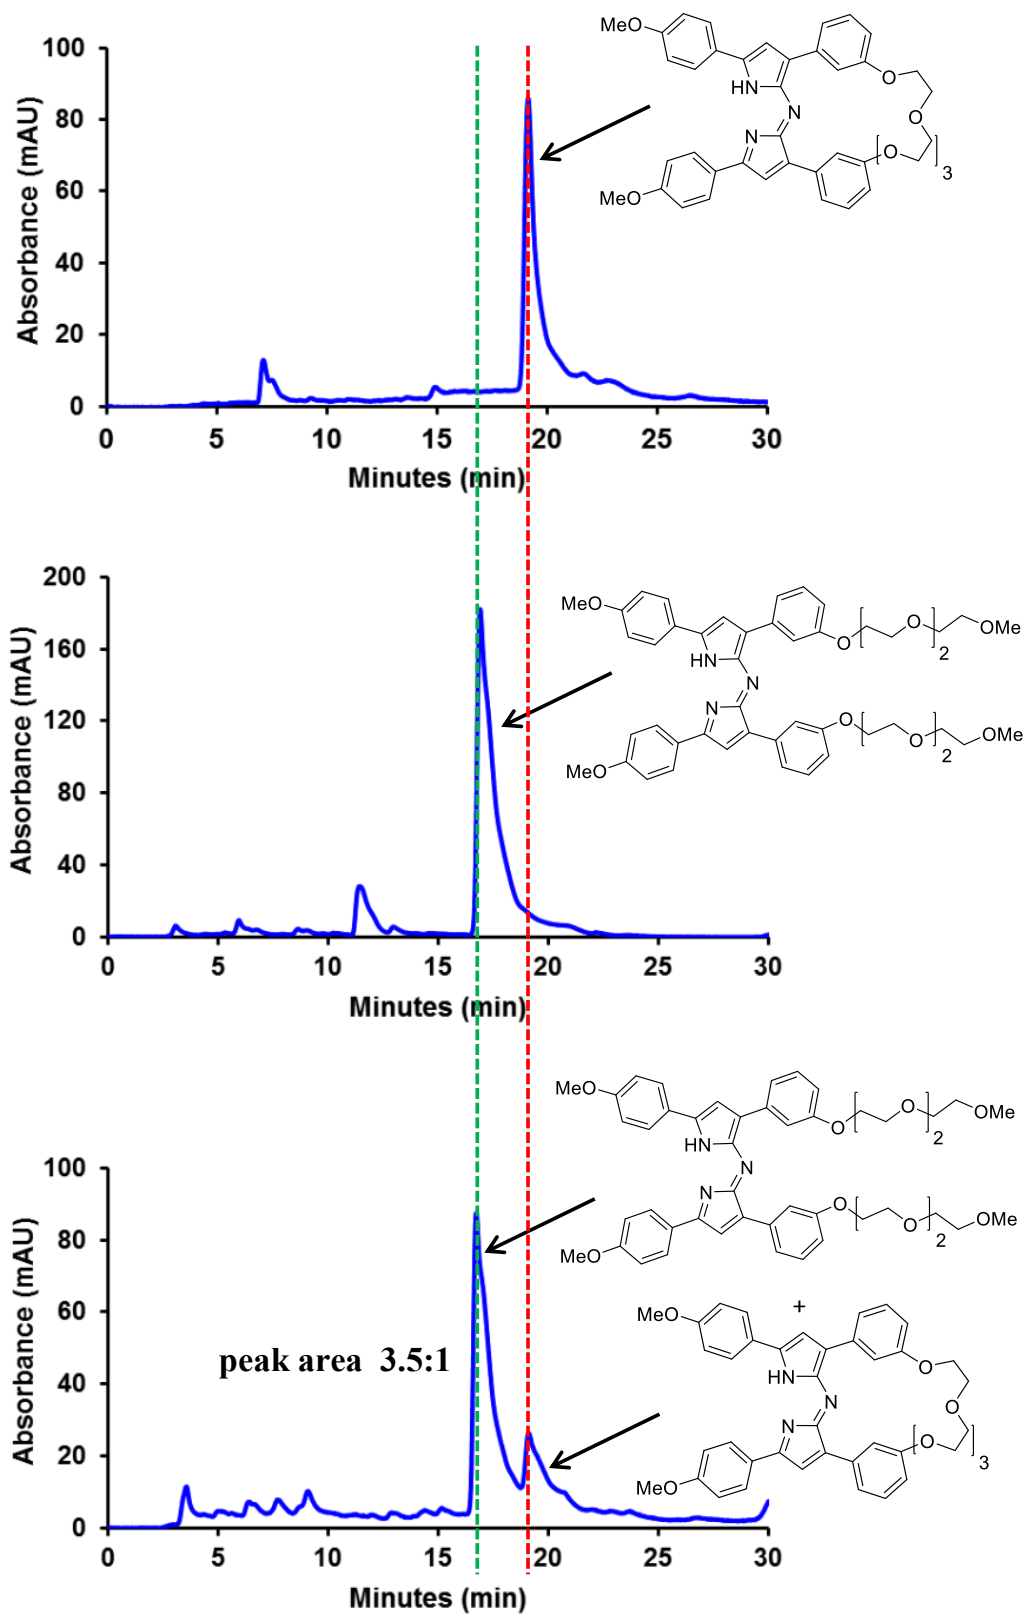

Figure S1. HPLC results in step (i)

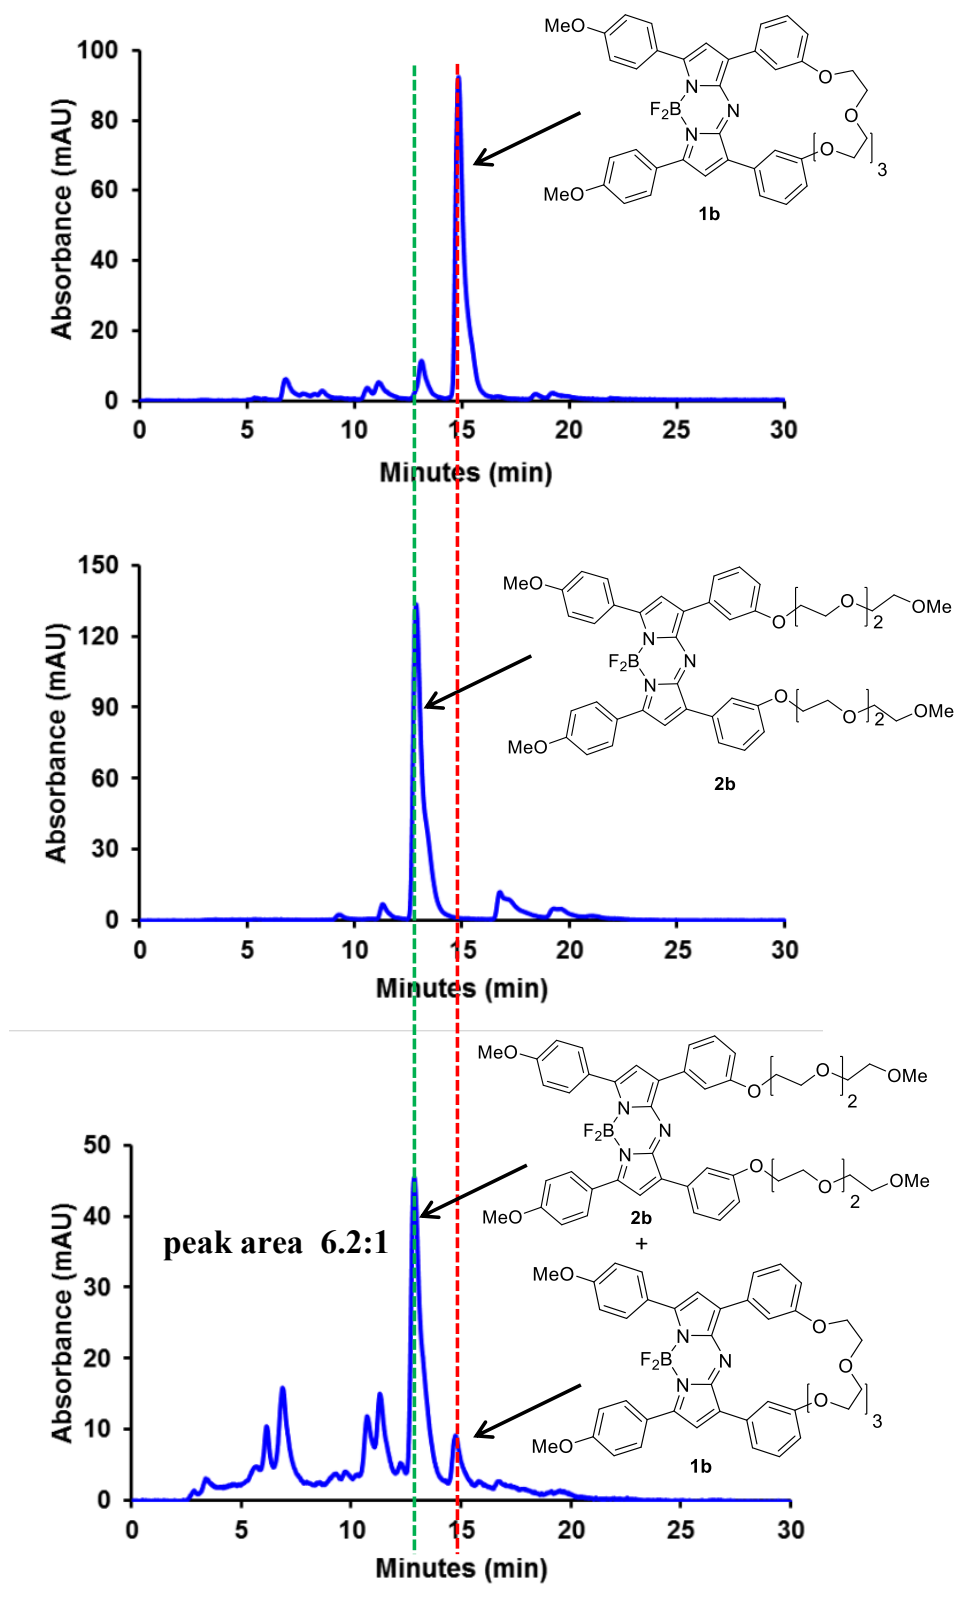

Figure S2. HPLC results in step (ii)

## 5. Fluorescence Spectroscopy

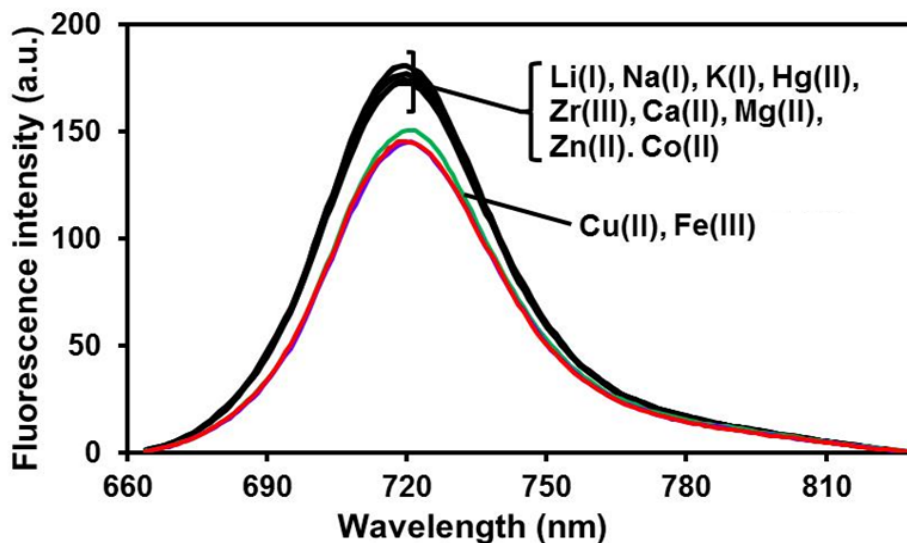

**Figure S3.** Fluorescence spectra (excited at 650 nm) of **1b** ( $1.38 \mu\text{M}$ ) in acetonitrile with addition of chloride salts of  $\text{Li}^+$ ,  $\text{Na}^+$ ,  $\text{K}^+$ ,  $\text{Zr}^{3+}$ ,  $\text{Hg}^{2+}$ ,  $\text{Ca}^{2+}$ ,  $\text{Mg}^{2+}$ ,  $\text{Zn}^{2+}$ ,  $\text{Co}^{2+}$ ,  $\text{Cu}^{2+}$  and  $\text{Fe}^{3+}$  ( $33 \mu\text{M}$ ) in water.

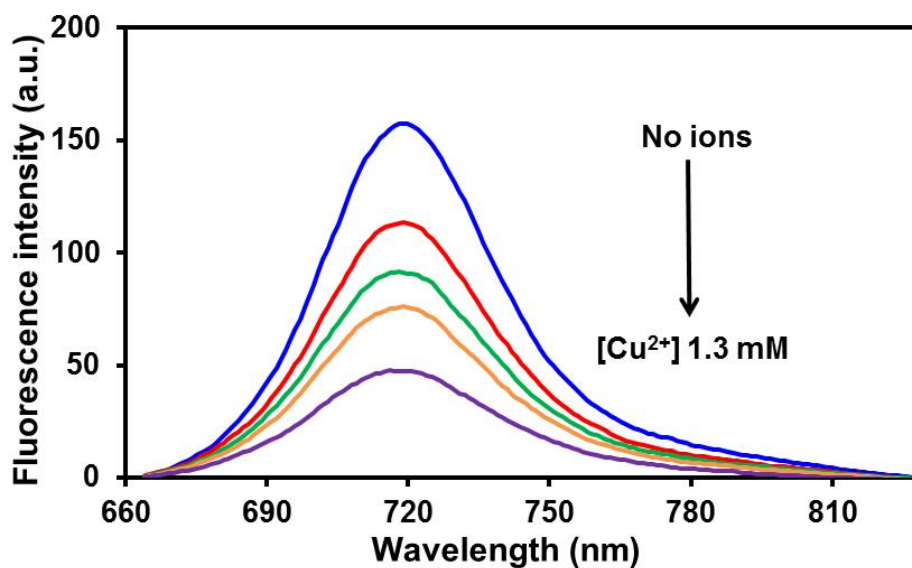

**Figure S4.** Fluorescence spectra (excited at 650 nm) of **1b** ( $1.38 \mu\text{M}$ ) in acetonitrile with  $\text{CuCl}_2$  in water.



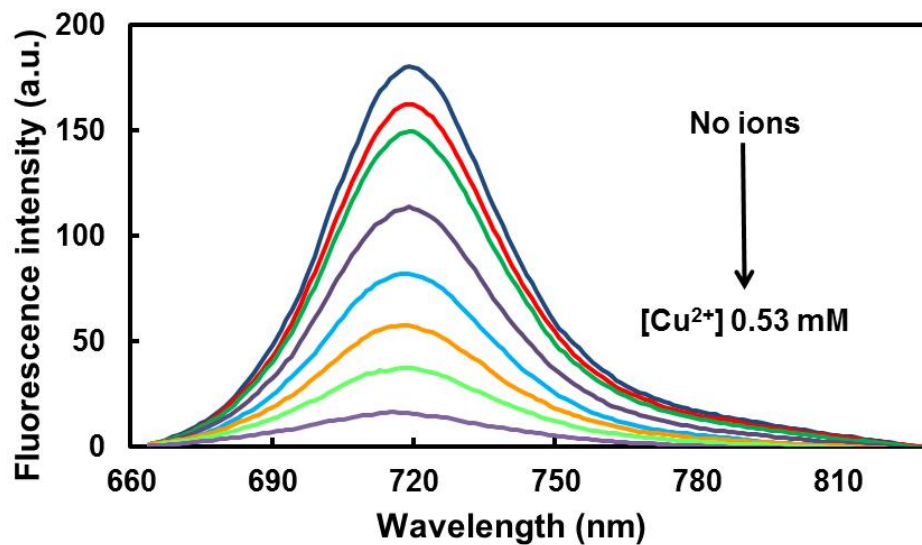

**Figure S5.** Fluorescence (excited at 650 nm) of **1b** (1.38 μM) in acetonitrile with Cu(ClO<sub>4</sub>)<sub>2</sub> in water.

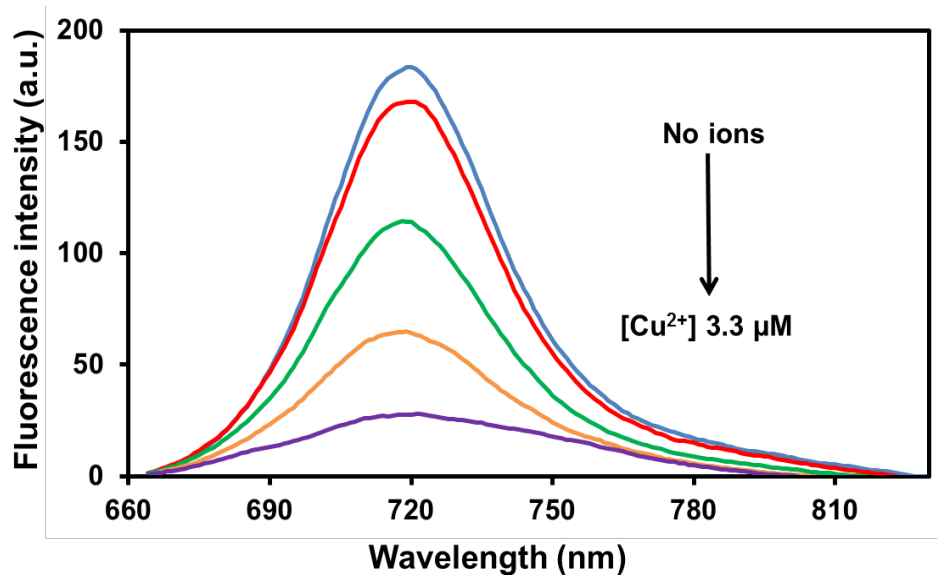

**Figure S6.** Fluorescence spectra (excited at 650 nm) of **1b** (1.38 μM) in acetonitrile with Cu(ClO<sub>4</sub>)<sub>2</sub> in acetonitrile.

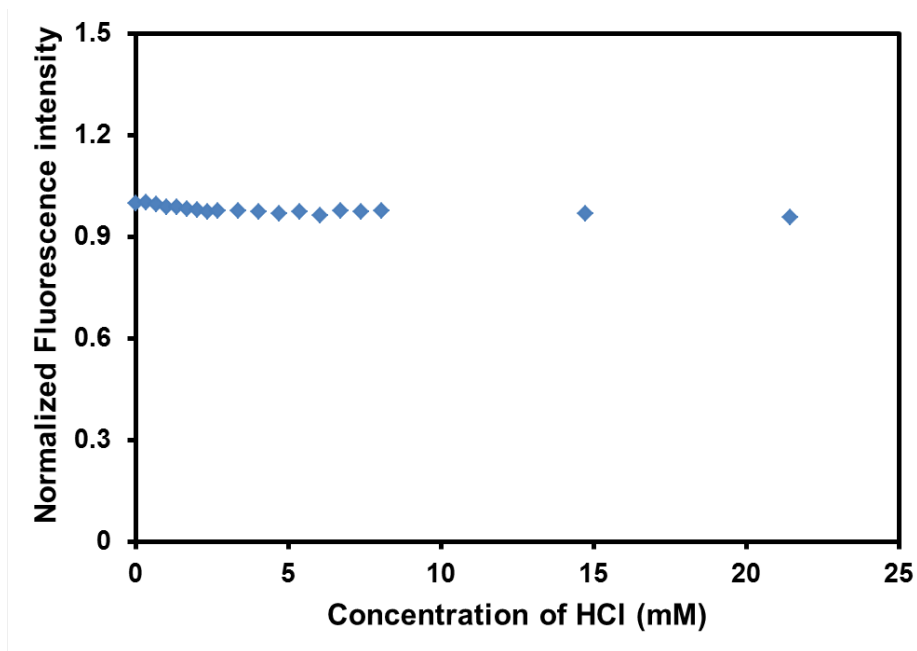

**Figure S7.** Normalized fluorescence intensity (excited at 650 nm) of **1b** (1.38  $\mu\text{M}$ ) in acetonitrile with HCl in water.

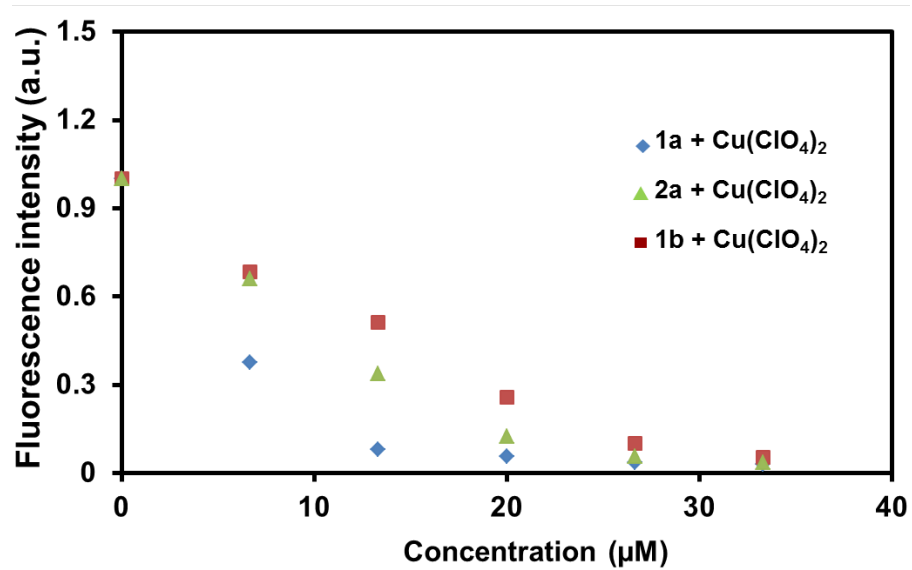

**Figure S8.** Normalized fluorescence intensity (excited at 650 nm) of **1a**, **2a** and **1b** (2.0  $\mu\text{M}$ ) in acetonitrile with  $\text{Cu}(\text{ClO}_4)_2$  in acetonitrile.

## 6. Structural Optimization by DFT Calculations and Cartesian Coordinates

Throughout, the initial geometry was firstly minimized by molecular mechanics with UFF force field with PCM water solvation in Gaussian 09. The final geometry optimization was performed at the B3LYP/6-31G(d') level with PCM water solvation using Gaussian 09.

As a control experiment, 15-crown-5 and Na<sup>+</sup>•15-crown-5 were studied. The energy-minimized structures are shown in Figure S9.

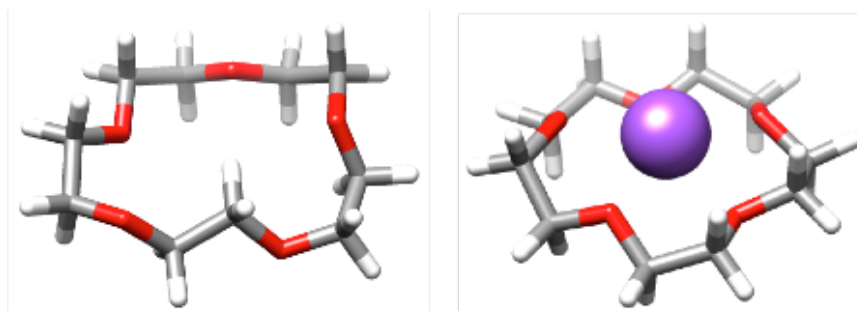

**Figure S9.** Optimized geometry for 15-crown-5 and Na<sup>+</sup>•15-crown-5.

Cartesian coordinates of 15-crown-5, Na<sup>+</sup>•15-crown-5, **1a**, Na<sup>+</sup>•**1a**, **1b**, Na<sup>+</sup>•**1b** are given in Angstrom.

**15-crown-5**

|   |             |             |             |
|---|-------------|-------------|-------------|
| C | 1.96357900  | 2.05088200  | -0.30103500 |
| H | 1.99312200  | 1.62249200  | -1.31713600 |
| H | 2.31757200  | 3.09464600  | -0.37656500 |
| C | 2.88297900  | 1.28740800  | 0.64572600  |
| H | 3.92633200  | 1.40007100  | 0.30841200  |
| H | 2.80143400  | 1.72173000  | 1.64958600  |
| C | -0.31194000 | 2.63532300  | -0.61631200 |
| H | -0.14358400 | 3.72587200  | -0.63935300 |
| H | -0.23720800 | 2.26194400  | -1.65151100 |
| C | -1.69711600 | 2.34916600  | -0.06955000 |
| H | -1.71117300 | 2.55639100  | 1.01324800  |
| H | -2.43154400 | 3.01816100  | -0.54990600 |
| C | 3.00063600  | -0.92276400 | -0.26274600 |
| H | 2.78388800  | -0.48828500 | -1.25064600 |
| H | 4.09474100  | -1.05525700 | -0.18603000 |
| O | 0.64511800  | 1.99975600  | 0.21435500  |
| O | 2.53918400  | -0.08418200 | 0.78857500  |
| O | -2.02441700 | 0.99135500  | -0.31993000 |
| C | -3.16052700 | 0.54856800  | 0.40264500  |
| H | -4.05280300 | 1.14391200  | 0.13691000  |
| H | -2.99075200 | 0.66555000  | 1.48669300  |
| C | -3.42797500 | -0.91500000 | 0.08159500  |
| H | -4.35165900 | -1.21500900 | 0.59456300  |
| H | -3.58800500 | -1.03944100 | -0.99966000 |
| O | -2.40075400 | -1.78279300 | 0.54302000  |
| C | 2.31506500  | -2.28006700 | -0.16548500 |
| H | 2.86812400  | -2.99155100 | -0.79199100 |
| H | 2.35405800  | -2.63847200 | 0.87664200  |
| C | -0.00713700 | -1.78759900 | 0.24355200  |
| H | 0.06943700  | -2.29236400 | 1.22199700  |
| H | 0.10593200  | -0.70854700 | 0.39943800  |
| C | -1.36366500 | -2.08982300 | -0.38624500 |
| H | -1.41639100 | -3.15928100 | -0.64374900 |
| H | -1.47772300 | -1.51111700 | -1.31095400 |
| O | 0.98121900  | -2.29513700 | -0.65137900 |

**Na<sup>+</sup>•15-crown-5**

|    |             |             |             |
|----|-------------|-------------|-------------|
| C  | -2.66910000 | -1.32298800 | -0.42172700 |
| H  | -2.46079500 | -0.98805500 | -1.45044500 |
| H  | -3.43092900 | -2.11667700 | -0.46891500 |
| C  | -3.18661200 | -0.17839600 | 0.44037200  |
| H  | -4.12355000 | 0.21254200  | 0.02038900  |
| H  | -3.38848100 | -0.54564000 | 1.45289000  |
| C  | -0.83213800 | -2.86278000 | -0.54695600 |
| H  | -1.39081300 | -3.80353200 | -0.43149400 |
| H  | -0.79253200 | -2.60954600 | -1.61763500 |
| C  | 0.57729800  | -3.02367700 | -0.00602400 |
| H  | 0.55369200  | -3.22992200 | 1.07606300  |
| H  | 1.07659800  | -3.86475700 | -0.51004200 |
| C  | -2.27823000 | 1.90399900  | -0.39713900 |
| H  | -2.21104800 | 1.48009800  | -1.41011500 |
| H  | -3.22475800 | 2.45785300  | -0.31196600 |
| O  | -1.46867800 | -1.80986300 | 0.17737900  |
| O  | -2.22263300 | 0.87014800  | 0.59069200  |
| O  | 1.26892900  | -1.80240900 | -0.25879700 |
| C  | 2.58248900  | -1.71853500 | 0.29066500  |
| H  | 3.21981500  | -2.52977700 | -0.09198200 |
| H  | 2.53783900  | -1.80062300 | 1.38879800  |
| C  | 3.16216400  | -0.37985800 | -0.13232900 |
| H  | 4.18263200  | -0.26953900 | 0.26387600  |
| H  | 3.20869600  | -0.33208200 | -1.23052200 |
| O  | 2.31377100  | 0.65979100  | 0.35667600  |
| C  | -1.11335300 | 2.84495600  | -0.15241800 |
| H  | -1.18218800 | 3.70876100  | -0.83050000 |
| H  | -1.13859800 | 3.21267200  | 0.88537000  |
| C  | 1.28236200  | 2.79557000  | 0.02949800  |
| H  | 1.38636600  | 3.75916400  | -0.49137500 |
| H  | 1.24179500  | 2.98957000  | 1.11337200  |
| C  | 2.46546800  | 1.90953700  | -0.31624400 |
| H  | 3.40028000  | 2.40561700  | -0.01446400 |
| H  | 2.49699700  | 1.74167600  | -1.40349600 |
| O  | 0.09453500  | 2.12153100  | -0.38617300 |
| Na | 0.01904600  | 0.00014800  | 0.68161800  |

## 1a

|   |             |             |             |
|---|-------------|-------------|-------------|
| C | -4.88085400 | -1.00846900 | -1.47743300 |
| H | -5.23901900 | -0.63947900 | -2.44473100 |
| H | -5.36032400 | -1.97385600 | -1.28700000 |
| C | -3.19385200 | 1.07111600  | 1.72108100  |
| H | -2.80330200 | 1.40169700  | 2.69480300  |
| H | -2.50096500 | 0.33617000  | 1.29394400  |
| C | -2.21456300 | 2.81706600  | 0.35812100  |
| C | -2.43696000 | 4.03155900  | -0.31234300 |
| C | -0.92009000 | 2.30030100  | 0.45724500  |
| C | -1.36489400 | 4.71415100  | -0.88182400 |
| H | -3.45108000 | 4.41818800  | -0.37288900 |
| C | 0.16243000  | 2.98236800  | -0.13655600 |
| H | -0.72620600 | 1.37506600  | 0.98309500  |
| C | -0.06924700 | 4.20074200  | -0.79942600 |
| H | -1.54250100 | 5.65272400  | -1.40208300 |
| H | 0.75591400  | 4.72524400  | -1.27337600 |
| C | -2.75173700 | -2.06574200 | -0.90412800 |
| C | -3.28751400 | -3.22825200 | -0.33173900 |
| C | -1.37423500 | -1.81966300 | -0.81664300 |
| C | -2.43521600 | -4.12720600 | 0.31676500  |
| H | -4.34925100 | -3.44382800 | -0.37720700 |
| C | -0.51722600 | -2.72264800 | -0.16468700 |
| H | -0.98011900 | -0.91698300 | -1.27062500 |
| C | -1.06657900 | -3.89151600 | 0.40267300  |
| H | -2.85656600 | -5.02467100 | 0.76459700  |
| H | -0.42599800 | -4.59110600 | 0.93229800  |
| O | -3.33193600 | 2.21139400  | 0.86072500  |
| O | -3.45982900 | -1.14017100 | -1.62287300 |
| C | 1.52048200  | 2.43703300  | -0.06893500 |
| C | 1.89777900  | 1.04525600  | -0.02392900 |
| C | 2.72084300  | 3.14986800  | -0.06881600 |
| C | 3.78624900  | 2.22608300  | -0.00648500 |
| H | 2.84090500  | 4.22591200  | -0.07663300 |
| C | 0.92787600  | -2.49150400 | -0.07672500 |
| C | 1.62404700  | -1.22711400 | -0.05591800 |
| C | 1.92355400  | -3.46514800 | 0.02706600  |

|   |             |             |             |
|---|-------------|-------------|-------------|
| C | 3.17617600  | -2.81814200 | 0.09184700  |
| H | 1.78855300  | -4.53930900 | 0.02258700  |
| N | 2.99617000  | -1.47804100 | 0.04300100  |
| N | 3.29231300  | 0.96593500  | 0.01874200  |
| N | 1.10043400  | -0.01151000 | -0.07344200 |
| B | 4.08456300  | -0.36920500 | 0.08188500  |
| F | 4.94629700  | -0.48427100 | -1.01767300 |
| F | 4.82787300  | -0.44828500 | 1.26758500  |
| C | -5.23034800 | 0.00051700  | -0.39546700 |
| H | -6.31521200 | 0.20238400  | -0.42283200 |
| H | -4.70184400 | 0.93959800  | -0.59443800 |
| C | -4.55893800 | 0.40759100  | 1.88544600  |
| H | -4.55230600 | -0.16567800 | 2.81966400  |
| H | -5.34329800 | 1.17677400  | 1.96292800  |
| O | -4.85657400 | -0.54003800 | 0.86857600  |
| C | 4.52925300  | -3.43951300 | 0.18823000  |
| H | 5.15255000  | -3.13530600 | -0.66202800 |
| H | 5.04303200  | -3.09836300 | 1.09572500  |
| H | 4.45435300  | -4.53017600 | 0.20686500  |
| C | 5.24987500  | 2.51148300  | 0.04169100  |
| H | 5.69151400  | 2.09811100  | 0.95731100  |
| H | 5.76180200  | 2.03189200  | -0.80188200 |
| H | 5.43545900  | 3.58854100  | 0.00907000  |

Na<sup>+</sup>•1a

|   |             |             |             |
|---|-------------|-------------|-------------|
| C | -4.30426200 | -1.74471000 | -1.07200300 |
| H | -5.03448800 | -1.75391300 | -1.88863900 |
| H | -4.57785300 | -2.52047500 | -0.34893000 |
| C | -3.77892500 | 1.63634000  | 2.29337900  |
| H | -4.41034400 | 2.05202400  | 3.08693400  |
| H | -2.75498200 | 1.60826700  | 2.67919800  |
| C | -2.88555700 | 2.69299500  | 0.28395200  |
| C | -3.27835400 | 3.18922300  | -0.96902500 |
| C | -1.52608200 | 2.45976600  | 0.54364200  |
| C | -2.32400500 | 3.44231400  | -1.95069000 |
| H | -4.33467700 | 3.37257300  | -1.14699500 |
| C | -0.56715300 | 2.69412200  | -0.46028500 |
| H | -1.18703500 | 2.16041500  | 1.53098300  |
| C | -0.97048400 | 3.19654600  | -1.70678200 |
| H | -2.63857200 | 3.82845700  | -2.91758400 |
| H | -0.22802300 | 3.38232900  | -2.47800900 |
| C | -2.11837200 | -2.79028700 | -0.99988600 |
| C | -2.43486700 | -4.00680300 | -0.37721600 |
| C | -0.79870800 | -2.32370800 | -0.99169400 |
| C | -1.42631500 | -4.72037800 | 0.27619100  |
| H | -3.44650200 | -4.40053000 | -0.41302300 |
| C | 0.20774100  | -3.01654800 | -0.29053000 |
| H | -0.56980200 | -1.40688200 | -1.52731600 |
| C | -0.12037400 | -4.23431100 | 0.33638900  |
| H | -1.67010900 | -5.66524600 | 0.75619400  |
| H | 0.63805900  | -4.77885400 | 0.89196600  |
| O | -3.90409900 | 2.53223300  | 1.18502400  |
| O | -3.03053600 | -2.02733500 | -1.68071900 |
| C | 0.87644100  | 2.47550100  | -0.21961700 |
| C | 1.57298500  | 1.22297900  | -0.05446400 |
| C | 1.85983200  | 3.45519300  | -0.23622900 |
| C | 3.11892400  | 2.82705300  | -0.05955900 |
| H | 1.70870100  | 4.52131600  | -0.35043000 |
| C | 1.55359200  | -2.45323000 | -0.15342400 |
| C | 1.89504800  | -1.05122700 | -0.07071200 |



|    |             |             |             |
|----|-------------|-------------|-------------|
| C  | 2.75712300  | -3.14231700 | -0.03004700 |
| C  | 3.79705000  | -2.19431600 | 0.10754100  |
| H  | 2.90201100  | -4.21464500 | -0.06546700 |
| N  | 3.27763900  | -0.94536800 | 0.07544400  |
| N  | 2.94227200  | 1.49240600  | 0.03599200  |
| N  | 1.07215200  | -0.00727800 | -0.09071000 |
| B  | 4.03752900  | 0.40334900  | 0.22755700  |
| F  | 5.02332700  | 0.52385100  | -0.75575300 |
| F  | 4.61668100  | 0.50191100  | 1.49721200  |
| C  | -4.33260400 | -0.37127900 | -0.41366900 |
| H  | -5.38161200 | -0.10144800 | -0.23883400 |
| H  | -3.89365700 | 0.37696100  | -1.08590200 |
| C  | -4.29540800 | 0.23773900  | 1.95239000  |
| H  | -4.13984500 | -0.41282000 | 2.82272000  |
| H  | -5.37139800 | 0.27913700  | 1.74524500  |
| O  | -3.61948800 | -0.36328000 | 0.83690900  |
| C  | 5.25772600  | -2.44851500 | 0.26438000  |
| H  | 5.81946800  | -1.97789100 | -0.55174800 |
| H  | 5.62267800  | -2.00377400 | 1.19901700  |
| H  | 5.46507800  | -3.52175700 | 0.27377300  |
| C  | 4.46128200  | 3.47001100  | 0.02580800  |
| H  | 4.94995700  | 3.21021600  | 0.97360800  |
| H  | 5.11326400  | 3.10581000  | -0.77748500 |
| H  | 4.37384700  | 4.55728200  | -0.04576600 |
| Na | -1.24463300 | -0.62448400 | 1.00215600  |

**1b**

|   |             |             |             |
|---|-------------|-------------|-------------|
| C | 5.37220800  | -1.61501500 | 2.15854000  |
| H | 5.88884000  | -2.01038400 | 3.04955200  |
| H | 4.85307900  | -2.44441500 | 1.66298200  |
| C | 6.39484100  | -1.02081500 | 1.21110100  |
| H | 6.83185900  | -0.10917000 | 1.65316100  |
| H | 7.21385700  | -1.74572000 | 1.05981200  |
| C | 6.58641100  | -0.04204600 | -0.93932900 |
| H | 7.37029300  | -0.71349200 | -1.33158300 |
| H | 7.08732600  | 0.81219500  | -0.45348500 |
| C | 5.73106300  | 0.46502000  | -2.08500700 |
| H | 6.38564900  | 0.90671100  | -2.85582700 |
| H | 5.17799600  | -0.36933400 | -2.54857100 |
| C | 4.07815500  | 2.09940100  | -2.56726500 |
| H | 3.50141100  | 1.38472100  | -3.17740100 |
| H | 4.74206400  | 2.66338400  | -3.24499100 |
| C | 3.14308600  | 3.06976200  | -1.87375800 |
| H | 2.76240300  | 3.81831400  | -2.58303500 |
| H | 3.70606100  | 3.58434600  | -1.08509800 |
| C | 3.27637400  | -1.06913600 | 3.17903700  |
| H | 2.98675200  | -0.31717800 | 3.92530700  |
| H | 3.47153800  | -2.01250100 | 3.71056000  |
| C | 2.10488200  | -1.24669700 | 2.22183700  |
| H | 1.20927200  | -1.52421400 | 2.79751600  |
| H | 1.90091900  | -0.30976100 | 1.68392100  |
| C | 1.51529600  | -2.68597900 | 0.37471700  |
| C | 1.97029900  | -3.64043000 | -0.55095700 |
| C | 0.18668800  | -2.24936100 | 0.33739100  |
| C | 1.09152400  | -4.16661200 | -1.49306200 |
| H | 3.00913000  | -3.95715500 | -0.50649500 |
| C | -0.70886200 | -2.80609900 | -0.60004900 |
| H | -0.18097300 | -1.51645800 | 1.04565400  |
| C | -0.24534300 | -3.76607600 | -1.51679500 |
| H | 1.45004100  | -4.90107200 | -2.21079700 |
| H | -0.92730800 | -4.18210800 | -2.25334900 |
| C | 1.12672200  | 2.99765200  | -0.56470000 |
| C | 1.35939000  | 4.23938500  | 0.04305000  |

|   |             |             |             |
|---|-------------|-------------|-------------|
| C | -0.11474300 | 2.36267400  | -0.41029400 |
| C | 0.35235600  | 4.81716000  | 0.82381300  |
| H | 2.30463000  | 4.75744100  | -0.07645600 |
| C | -1.13703700 | 2.95890700  | 0.34612500  |
| H | -0.28141900 | 1.41612500  | -0.91327700 |
| C | -0.88000200 | 4.19536400  | 0.97972400  |
| H | 0.54094800  | 5.77182900  | 1.30993100  |
| H | -1.64491200 | 4.65994900  | 1.59489900  |
| O | 2.44118400  | -2.27523900 | 1.28745600  |
| O | 2.04598500  | 2.32942300  | -1.32408700 |
| O | 4.83194700  | 1.43338600  | -1.57132100 |
| O | 5.75309700  | -0.71735700 | -0.01534800 |
| O | 4.44947700  | -0.59461400 | 2.53569100  |
| C | -2.13579200 | -2.47149400 | -0.57443600 |
| C | -2.75970800 | -1.21041800 | -0.25595500 |
| C | -3.18422200 | -3.35630200 | -0.83060300 |
| C | -4.40209000 | -2.66952600 | -0.64296000 |
| H | -3.10093500 | -4.40657600 | -1.07973400 |
| C | -2.48704500 | 2.39082100  | 0.41794700  |
| C | -2.91808600 | 1.03028600  | 0.18837100  |
| C | -3.65631300 | 3.11233100  | 0.67256000  |
| C | -4.75476700 | 2.23472000  | 0.58033600  |
| H | -3.74033400 | 4.17473100  | 0.86068200  |
| N | -4.31404100 | 0.99095800  | 0.28551200  |
| N | -4.14702900 | -1.38689100 | -0.29775500 |
| N | -2.17171700 | -0.04087300 | -0.04284200 |
| B | -5.17489200 | -0.27524600 | 0.03525300  |
| F | -6.04935900 | -0.07036700 | -1.04148700 |
| F | -5.91486800 | -0.60865600 | 1.17884600  |
| C | -6.20273900 | 2.55334900  | 0.74749300  |
| H | -6.75185800 | 2.33853400  | -0.17788800 |
| H | -6.64491200 | 1.92610400  | 1.53137800  |
| H | -6.33948800 | 3.60615600  | 1.00913400  |
| C | -5.78918800 | -3.20498300 | -0.76648300 |
| H | -6.33086900 | -3.08779500 | 0.18067100  |
| H | -6.35086900 | -2.64484500 | -1.52424700 |
| H | -5.77185800 | -4.26313400 | -1.04128800 |

Na<sup>+</sup>•1b

|   |             |             |             |
|---|-------------|-------------|-------------|
| C | 0.00000000  | 0.00000000  | 0.00000000  |
| H | 0.00000000  | 0.00000000  | 1.09966594  |
| H | 1.03916103  | 0.00000000  | -0.35388522 |
| C | -0.72536069 | 1.23747779  | -0.48797191 |
| H | -1.77600570 | 1.22381294  | -0.15688435 |
| H | -0.23950287 | 2.13018872  | -0.06602873 |
| C | -1.37658255 | 2.35024630  | -2.50919296 |
| H | -0.88429735 | 3.30641036  | -2.27714174 |
| H | -2.40592367 | 2.38411125  | -2.11929463 |
| C | -1.39159805 | 2.13044342  | -4.00963933 |
| H | -1.89661644 | 2.97264678  | -4.50549382 |
| H | -0.36223154 | 2.06423088  | -4.39521846 |
| C | -2.02134711 | 0.47067733  | -5.62041068 |
| H | -0.97034782 | 0.37393052  | -5.93524927 |
| H | -2.52028736 | 1.18996897  | -6.28741990 |
| C | -2.72737520 | -0.86620812 | -5.71482877 |
| H | -2.70737739 | -1.22820150 | -6.75090198 |
| H | -3.77059442 | -0.76916814 | -5.39000045 |
| C | -0.10776851 | -2.40495987 | -0.05493122 |
| H | -0.92649460 | -3.05628127 | 0.27466145  |
| H | 0.55549472  | -2.22808808 | 0.80055587  |
| C | 0.65260377  | -3.10440132 | -1.17185914 |
| H | 1.08498876  | -4.04075437 | -0.78873968 |
| H | -0.01961927 | -3.35672586 | -2.00513888 |
| C | 2.49015288  | -2.58420521 | -2.64885281 |
| C | 3.47579820  | -1.64672942 | -2.99962982 |
| C | 2.39966484  | -3.80103818 | -3.33156501 |
| C | 4.37150936  | -1.93663857 | -4.02497849 |
| H | 3.52699447  | -0.70988945 | -2.45053031 |
| C | 3.31543100  | -4.09585692 | -4.36399475 |
| H | 1.65356668  | -4.53930646 | -3.06307586 |
| C | 4.30336301  | -3.15492841 | -4.70302249 |
| H | 5.13172703  | -1.20756784 | -4.29579165 |
| H | 4.99941667  | -3.37039816 | -5.50899039 |
| C | -2.57267399 | -3.07678509 | -4.77868548 |
| C | -3.84716856 | -3.28269646 | -4.24012420 |

|   |             |              |             |
|---|-------------|--------------|-------------|
| C | -1.78404470 | -4.14829627  | -5.19402285 |
| C | -4.33088912 | -4.58861138  | -4.12804673 |
| H | -4.44602860 | -2.43902326  | -3.90663316 |
| C | -2.26853466 | -5.46586881  | -5.08137063 |
| H | -0.80317404 | -3.95447737  | -5.61463325 |
| C | -3.55547309 | -5.66912143  | -4.54368611 |
| H | -5.31725488 | -4.76203504  | -3.70448567 |
| H | -3.93774471 | -6.68021633  | -4.43311748 |
| O | 1.67849932  | -2.21510436  | -1.61305456 |
| O | -2.02846343 | -1.80001623  | -4.86350287 |
| O | -2.08475379 | 0.90863416   | -4.26558846 |
| O | -0.66770211 | 1.26372296   | -1.91345560 |
| O | -0.68177590 | -1.16473107  | -0.48861361 |
| C | 3.29212552  | -5.39065552  | -5.05061673 |
| C | 2.14426274  | -6.19743535  | -5.38812302 |
| C | 4.39981781  | -6.10078449  | -5.51308934 |
| C | 3.94592458  | -7.30914658  | -6.08584413 |
| H | 5.44045037  | -5.81731940  | -5.41857917 |
| C | -1.49522888 | -6.61439428  | -5.56146536 |
| C | -0.06154077 | -6.75052972  | -5.64316991 |
| C | -2.01480707 | -7.81070293  | -6.05916180 |
| C | -0.93819868 | -8.63516118  | -6.44936956 |
| H | -3.05925989 | -8.06867718  | -6.17979965 |
| N | 0.22945758  | -7.99875495  | -6.20192289 |
| N | 2.59688468  | -7.36554788  | -6.01031954 |
| N | 0.86419960  | -5.89569371  | -5.23003244 |
| B | 1.66655762  | -8.51084822  | -6.49384935 |
| F | 1.83856101  | -8.74088672  | -7.86543793 |
| F | 1.92532139  | -9.69145126  | -5.78505119 |
| C | -0.99453730 | -9.99585048  | -7.05829420 |
| H | -0.48720860 | -10.00159967 | -8.03100093 |
| H | -0.47116059 | -10.72171283 | -6.42319153 |
| H | -2.03101101 | -10.31783027 | -7.19087756 |
| C | 4.76070845  | -8.40657595  | -6.68306480 |
| H | 4.57789056  | -9.35038875  | -6.15392328 |
| H | 4.47568129  | -8.56938975  | -7.72989395 |
| H | 5.82656491  | -8.16790885  | -6.63365210 |

Na            -1.31311602 -0.81765602 -2.78773432

## 7. Cellular Imaging

Subcellular localization was measured on living WEHI-13VAR cells using a Olympus FV1000 Confocal Microscope. Throughout, digital images were captured with a 100x / 1.4 oil objective with the following filter sets:

- for ER-Tracker Blue-White DPX: excitation 405 nm
- for aza-BODIPY: excitation 633 nm

Sequential optical sections (Z-stacks) from the basal-to-apical surfaces of the cell were also acquired.

### **Endoplasmic Reticulum Co-localization**

Cells were incubated with fluors for 3 h at 37 °C. After the cells were washed with PBS (2X), ER-Tracker Blue-White DPX was added and the cells were incubated for 20 min at 37 °C. The cells were washed again with PBS before imaging.

**A**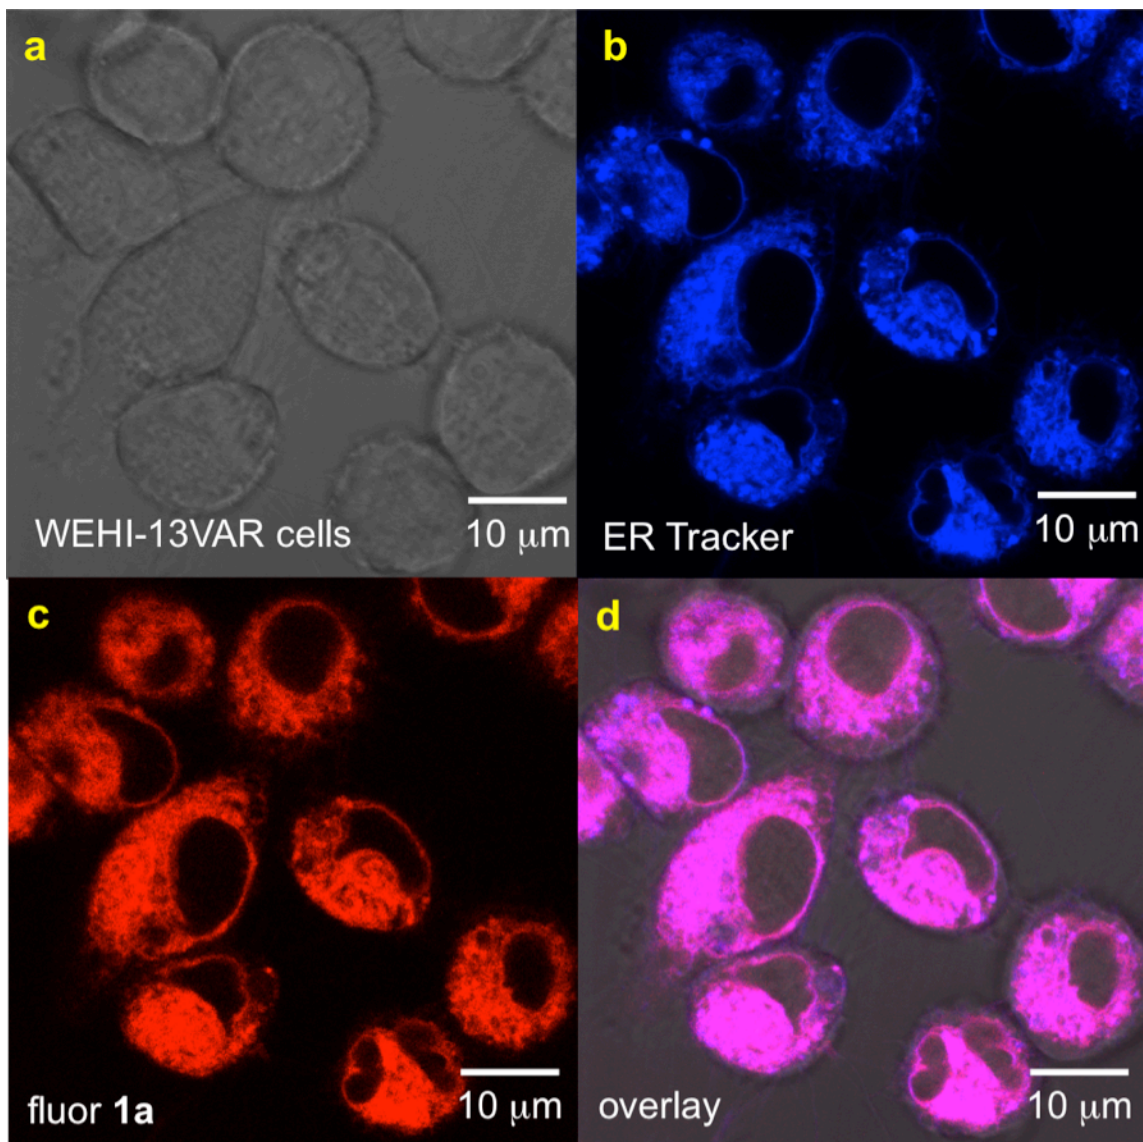



**B**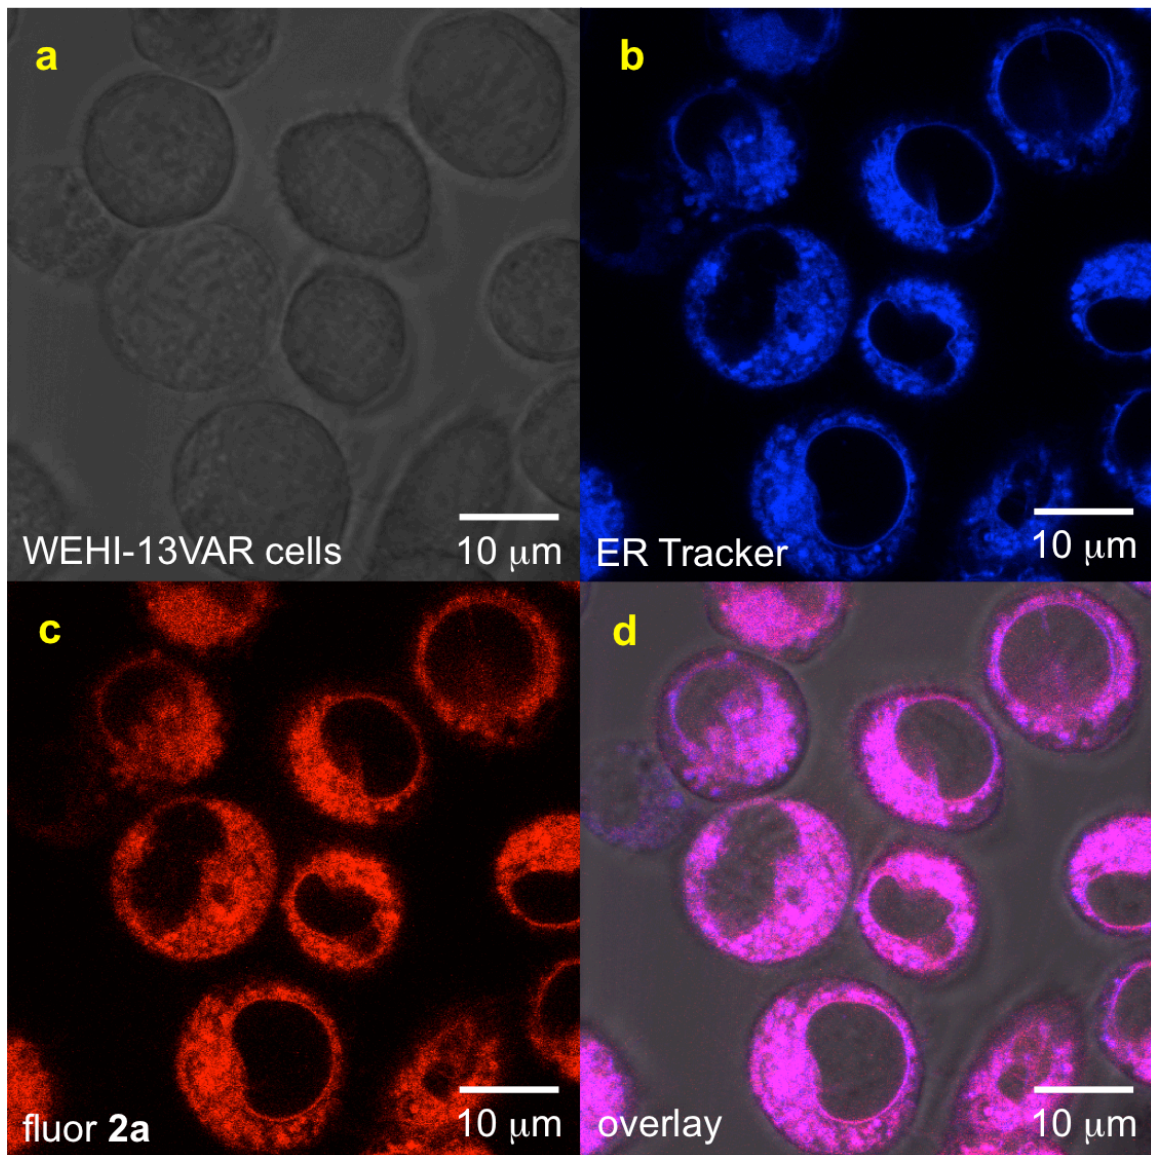

c

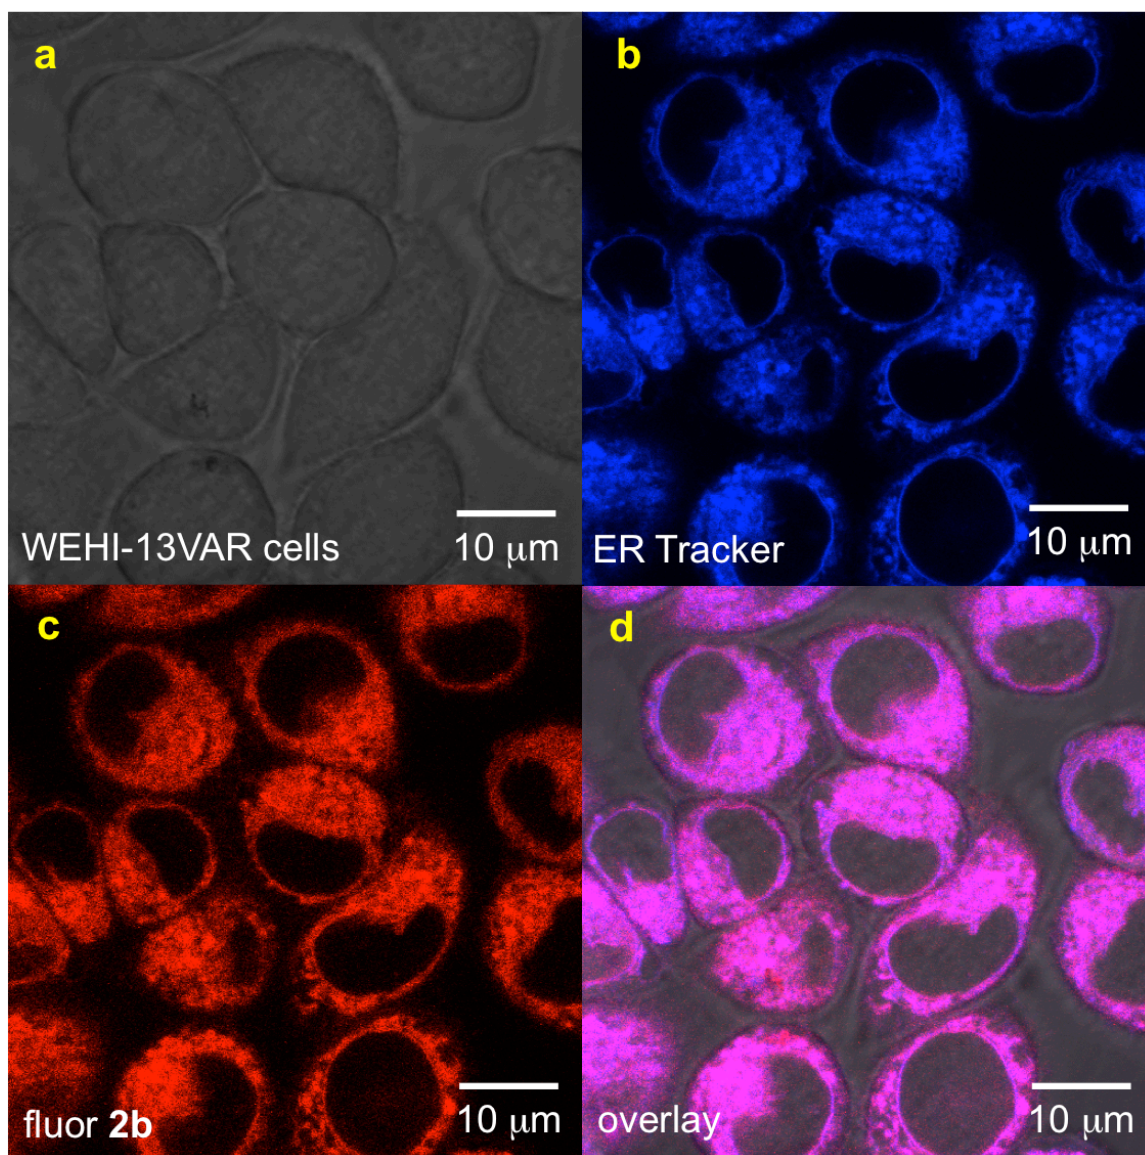

**Figure S10.** Images of WEHI-13VAR cells. **a** Under a bright-field (DIC image); **b** with ER tracker; **c** with fluor 1a (A), 2a (B) and 2b(C) ; and, **d** overlay of images a – c.

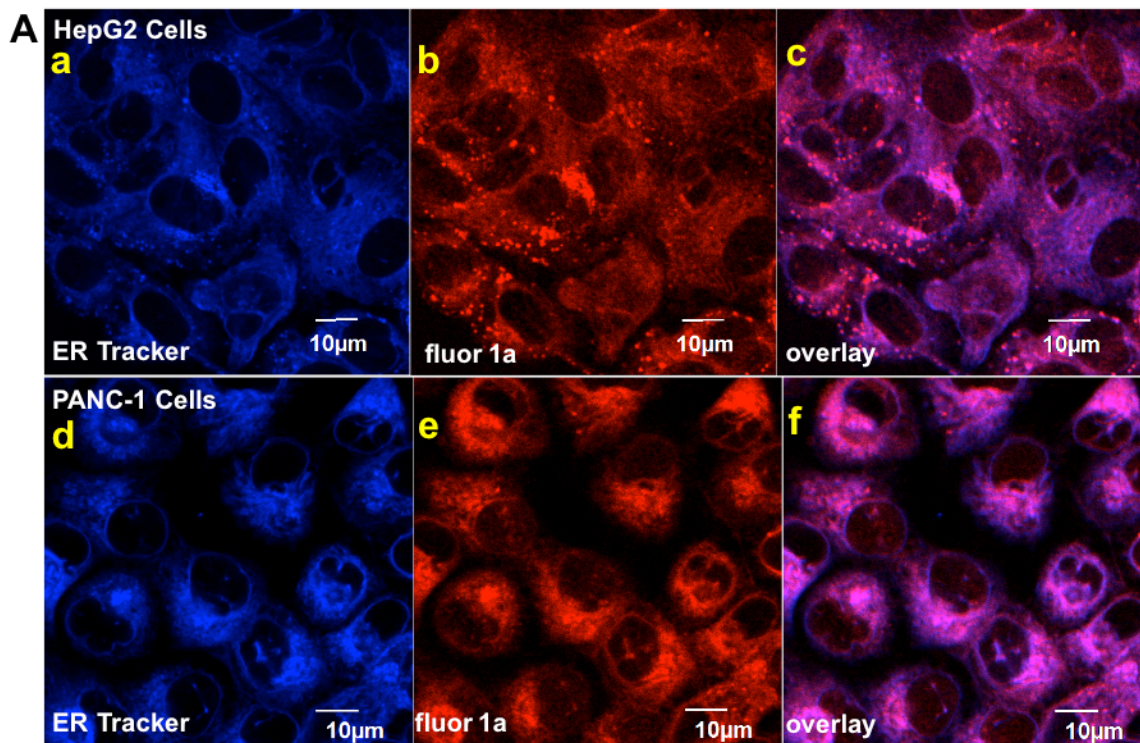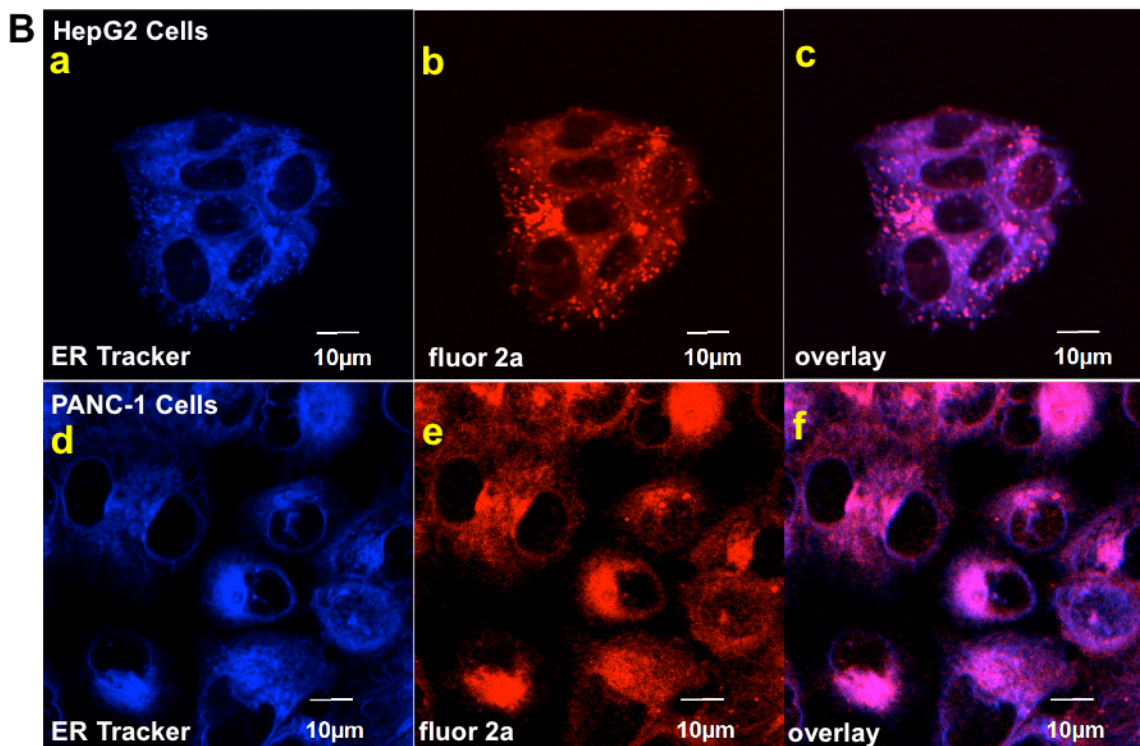

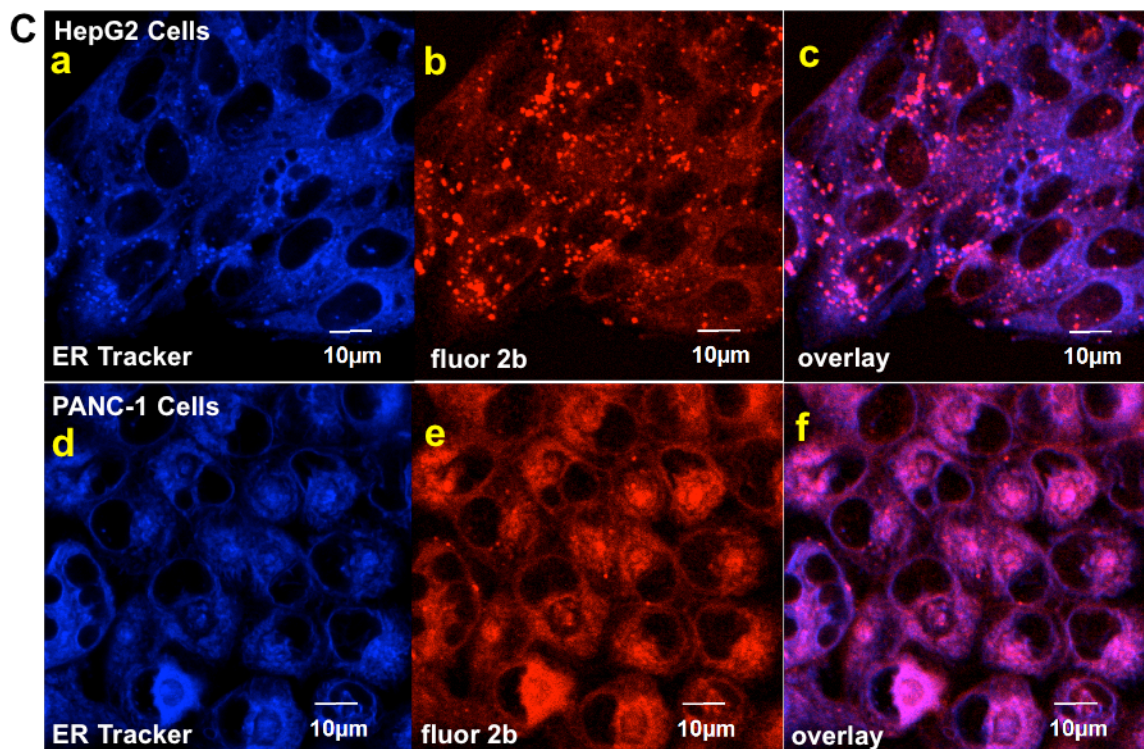

**Figure S11.** Parallel images for staining HepG2 cells (top) and PANC-1 (bottom) with: **a,d** ER tracker; **b,e** with fluor 1a (A), 2a (B) and 2b(C). **c,f** Shows the overlay of images for each cell type.
